# Supplementary material
Source: PubMed Central journal article supplement (PMC8360988)

# **Supplementary materials**

**Original agarose gels in this study**

# Specimens: respiratory samples tested by genomic PCR, subgenomic RNA PCR and culture-isolation

| Patient # | NP swab | Sputum | Saliva | Total |
|-----------|---------|--------|--------|-------|
| 1         | 4       | 6      | 6      | 16    |
| 2         | 6       | 4      | 3      | 13    |
| 3         | 6       | 7      | 4      | 17    |
| 4         | 7       | 6      | 5      | 18    |
| 5         | 6       | 6      | 8      | 20    |
| 6         | 2       | 2      | 3      | 7     |
| 7         | 4       | 0      | 0      | 4     |
| 8         | 0       | 3      | 3      | 6     |
| 9         | 1       | 1      | 1      | 3     |
| 10        | 2       | 1      | 0      | 3     |
|           | 38      | 36     | 33     | 107   |

# Additional specimens (CMI revision)

| Patient # | NP swab | Sputum | Saliva | Total |
|-----------|---------|--------|--------|-------|
| 11        | 4       | 2      | 1      | 7     |
| 12        | 6       | 3      | 3      | 12    |
| 13        | 4       | 4      | 3      | 11    |
| 14        | 3       | 4      | 3      | 10    |
| 15        | 3       | 3      | 2      | 8     |
| 16        | 4       | 3      | 2      | 9     |
| 17        | 4       | 0      | 0      | 4     |
| 18        | 3       | 3      | 2      | 8     |
| 19        | 2       | 1      | 2      | 5     |
| 20        | 3       | 3      | 2      | 8     |
|           | 36      | 26     | 20     | 82    |

# Patient 1: NP

| SOD | Band # | SGR-NP | SGR-SP |
|-----|--------|--------|--------|
| 8   | 1      | P      | P      |
| 11  | 2      | P      | P      |
| 12  | 3      | P      | P      |
| 15  | 4      | N      | N      |
| 17  | 5      | N      | N      |
| 20  | 6      | N      | N      |
| 24  | 7      | N      | N      |
| 28  | 8      | N      | N      |
| 32  | 9      | P      | P      |
| 35  | 10     | N      | N      |
| 40  | 11     | N      | N      |
| 42  | 12     | N      | N      |
|     | 13     | PC     | PC     |
|     | 14     | NC     | NC     |

**NP#9** sequencing:  
SARS-CoV-2 99%

**SP#9** sequencing:  
SARS-CoV-2 98%

NP

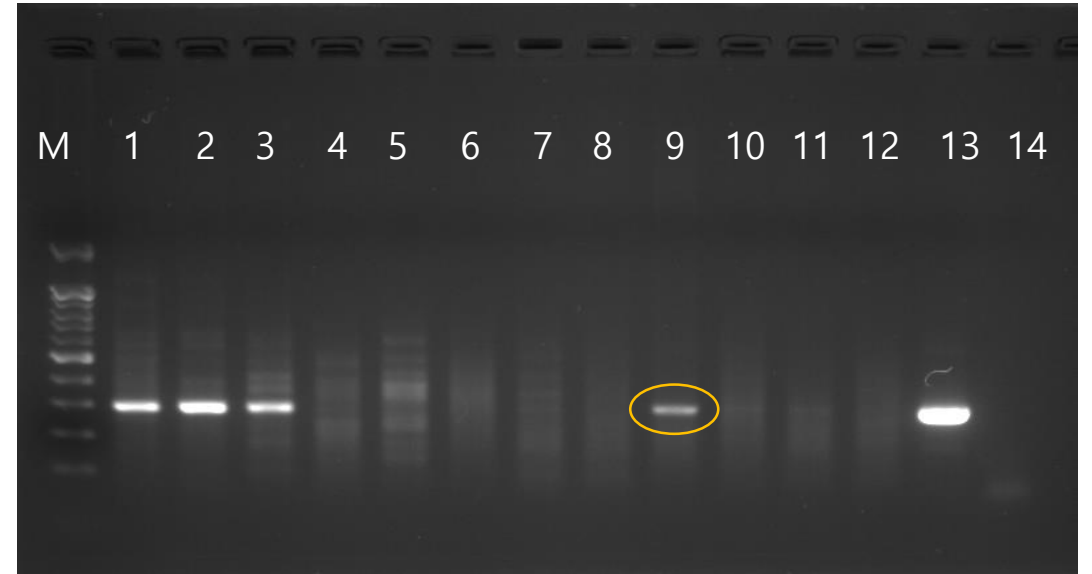

SP

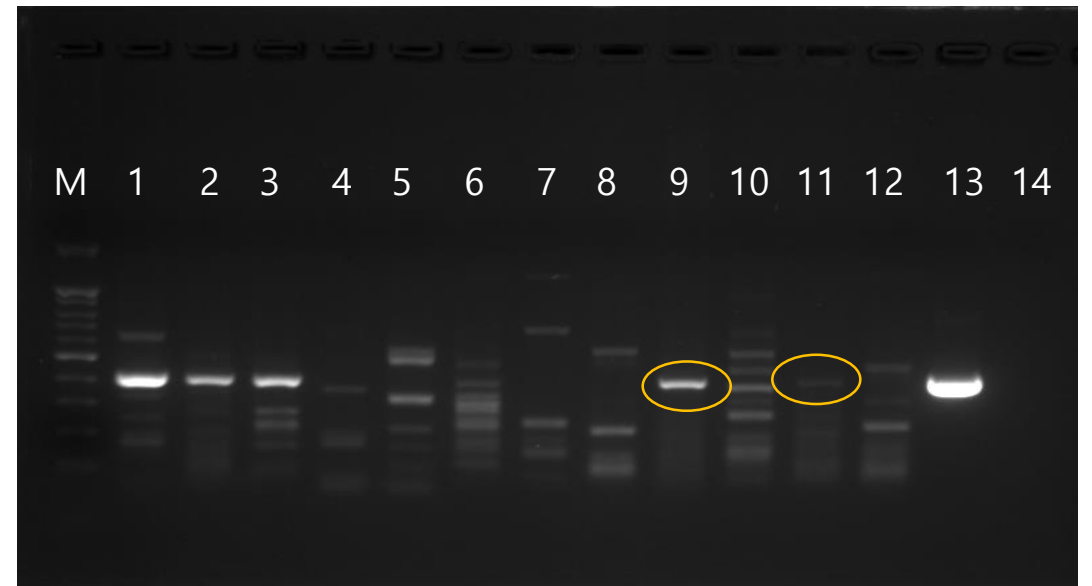

# Patient 1: Sputum

| SOD | Band # | SGR-NP | SGR-SP |
|-----|--------|--------|--------|
| 8   | 1      | P      | P      |
| 10  | 2      | P      | P      |
| 12  | 3      | P      | P      |
| 15  | 4      | N      | N      |
| 17  | 5      | N      | N      |
| 20  | 6      | N      | N      |
| 24  | 7      | N      | N      |
| 28  | 8      | N      | N      |
| 32  | 9      | N      | N      |
| 35  | 10     | N      | N      |
| 40  | 11     | N      | N      |
| 42  | 12     | N      | N      |
|     | 13     | PC     | PC     |
|     | 14     | NC     | NC     |

NP

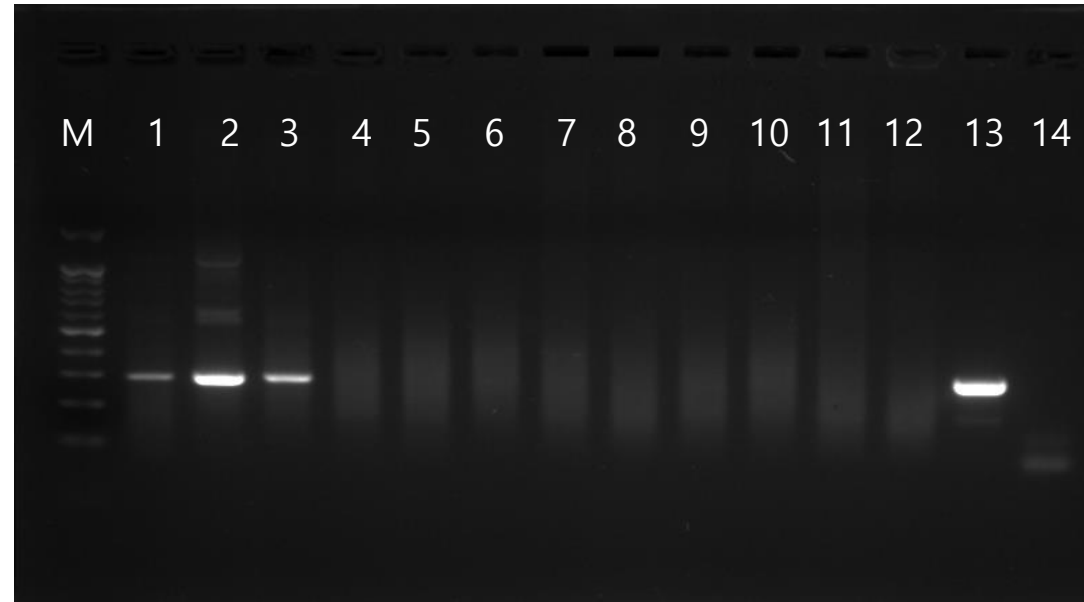

SP

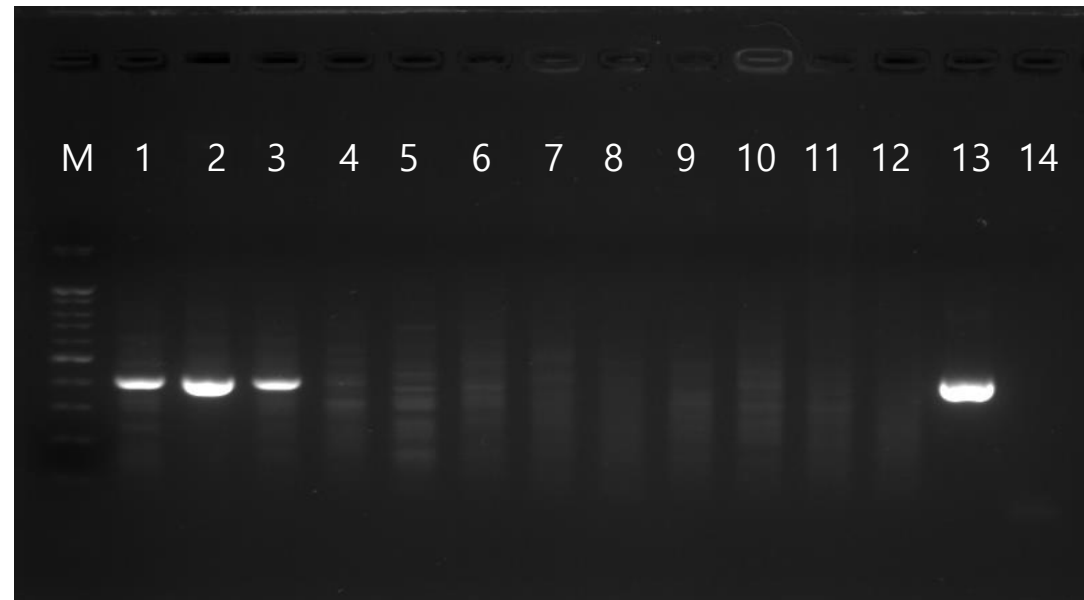

# Patient 1: saliva

| SOD | Band # | SGR-NP | SGR-SP |
|-----|--------|--------|--------|
| 8   | 1      | N      | P      |
| 11  | 2      | P      | P      |
| 15  | 3      | P      | P      |
| 17  | 4      | N      | N      |
| 20  | 5      | N      | N      |
| 24  | 6      | N      | N      |
| 28  | 7      | N      | N      |
| 32  | 8      | N      | N      |
| 40  | 9      | N      | N      |
| 42  | 10     | N      | N      |
|     | 11     | PC     | PC     |
|     | 12     | NC     | NC     |

NP

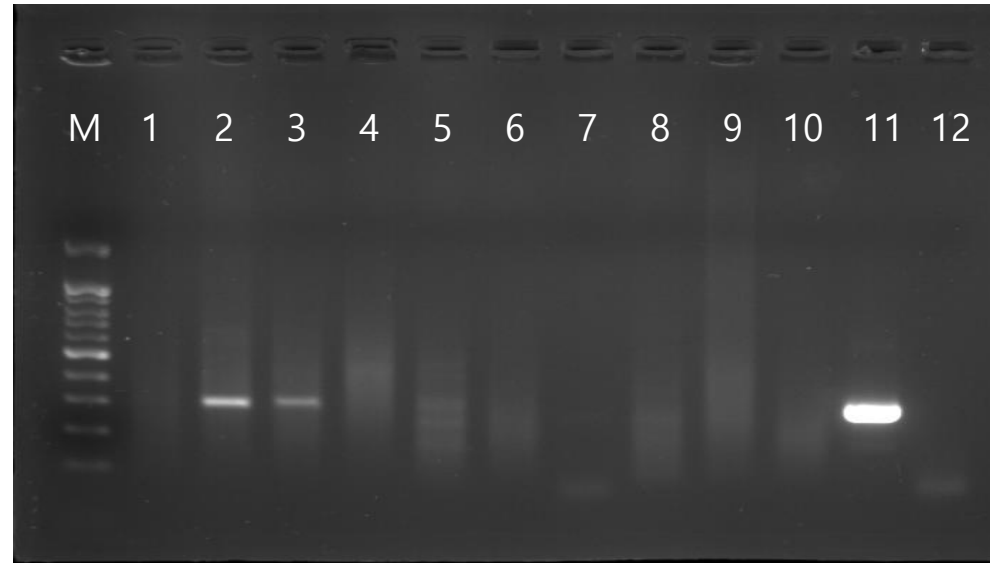

SP

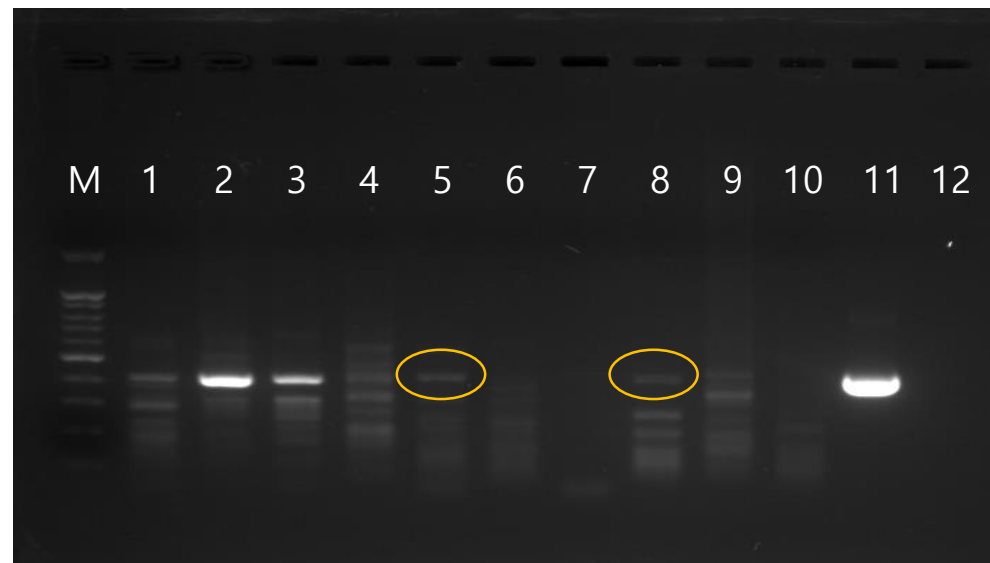

SP#5, 8 sequencing:  
No significant  
similarity found.

# Patient 2: NP

| SOD | Band # | SGR-NP | SGR-SP |
|-----|--------|--------|--------|
| 17  | 1      | P      | P      |
| 18  | 2      | P      | P      |
| 19  | 3      | P      | N      |
| 20  | 4      | N      | N      |
| 21  | 5      | N      | N      |
| 23  | 6      | P      | P      |
| 24  | 7      | N      | N      |
| 26  | 8      | N      | N      |
| 28  | 9      | N      | N      |
| 30  | 10     | N      | N      |
| 31  | 11     | N      | N      |
|     | 12     |        | PC     |
|     | 13     |        | NC     |

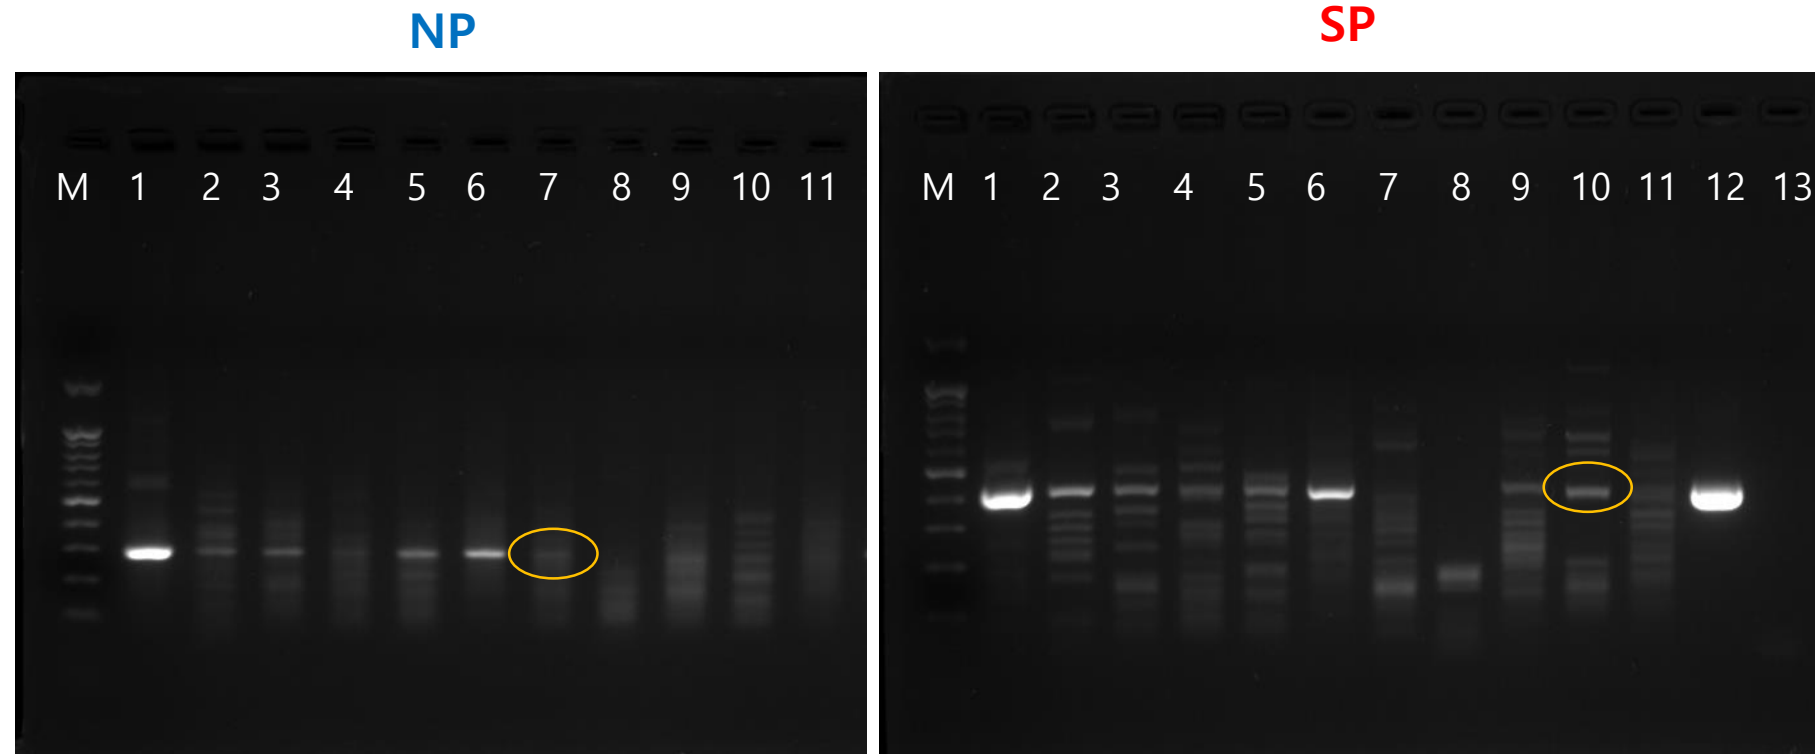

**NP #7: No primer bound**

**SP #10 : No significant similarity found.**

# Patient 2: sputum

| SOD | Band # | SGR-NP | SGR-SP |
|-----|--------|--------|--------|
| 17  | 1      | P      | P      |
| 18  | 2      | P      | P      |
| 19  | 3      | P      | P      |
| 20  | 4      | P      | P      |
| 21  | 5      | P      | P      |
| 24  | 6      | N      | N      |
| 26  | 7      | N      | N      |
| 28  | 8      | N      | N      |
| 30  | 9      | N      | N      |
| 31  | 10     | N      | N      |
|     | 11     | NC     | NC     |

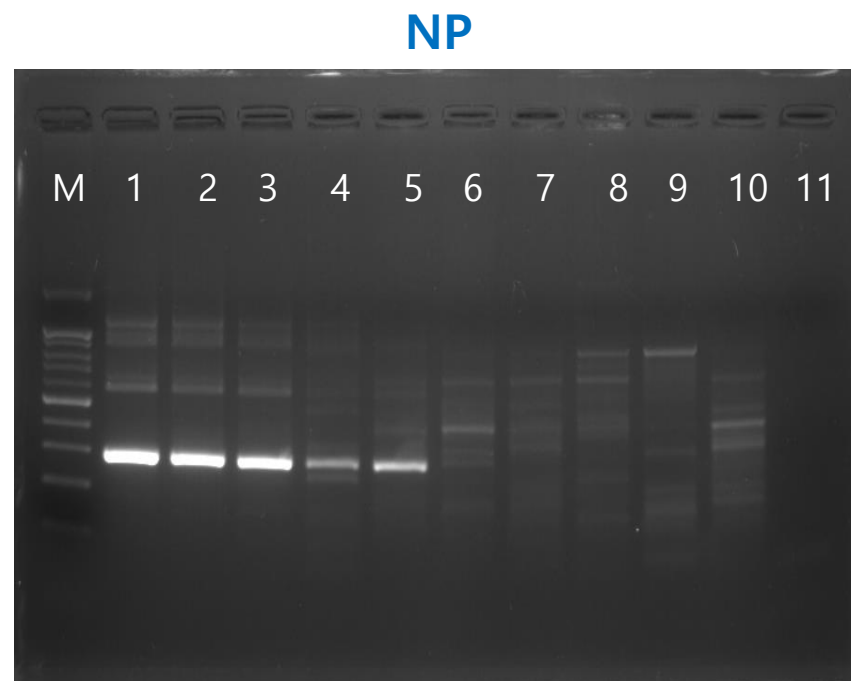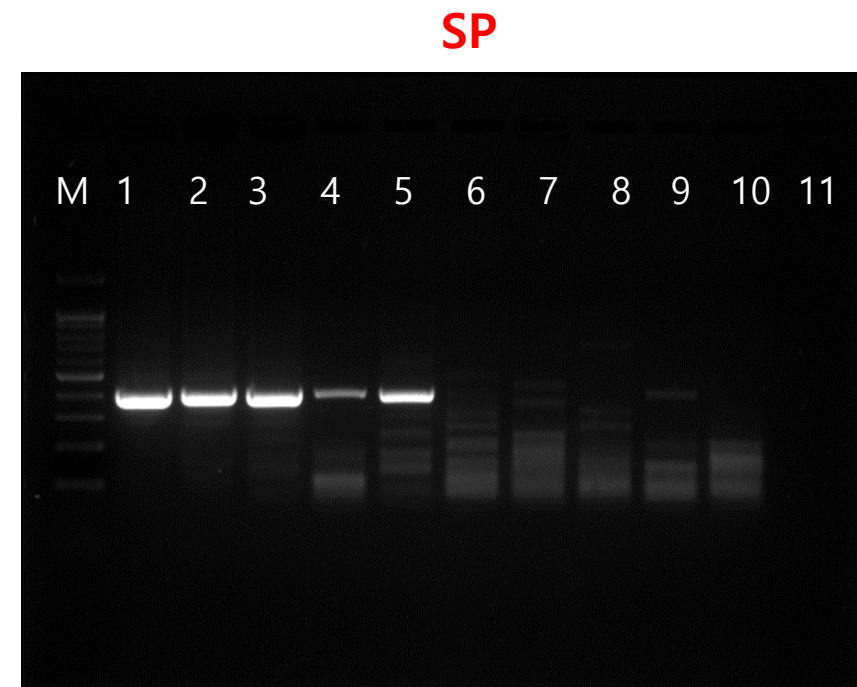



# Patient 2: Saliva

| SOD | Band # | SGR-NP | SGR-SP |
|-----|--------|--------|--------|
| 17  | 1      | P      | P      |
| 18  | 2      | P      | P      |
| 20  | 3      | N      | N      |
| 21  | 4      | N      | N      |
| 23  | 5      | N      | N      |
| 26  | 6      | N      | N      |
| 28  | 7      | N      | N      |
| 31  | 8      | N      | N      |
|     | 9      | PC     |        |
|     | 10     | NC     |        |

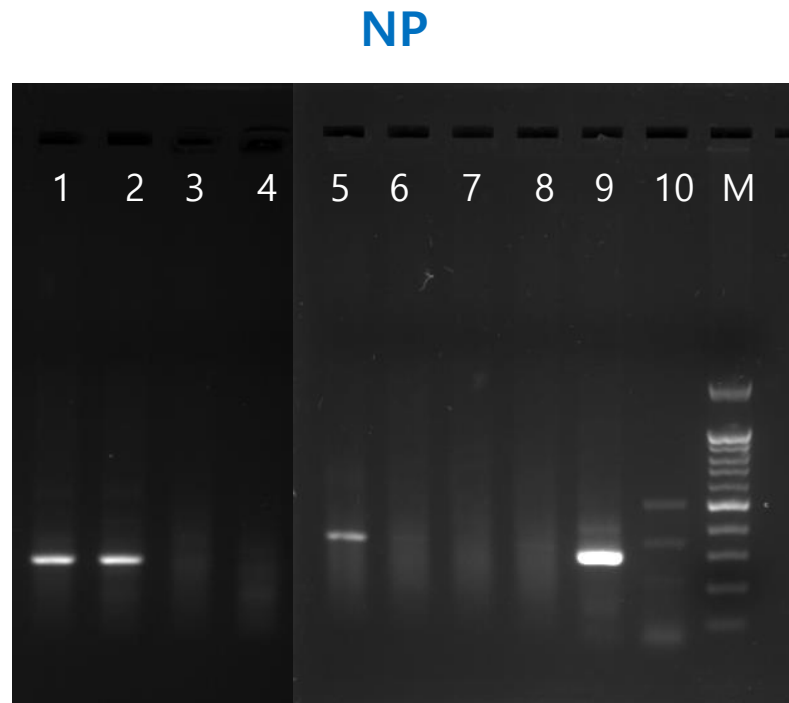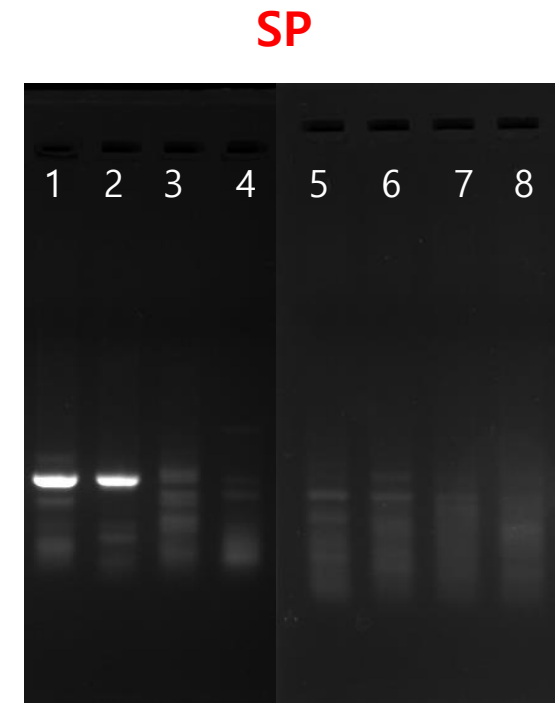

# Patient 3: NP

| SOD | Band # | SGR-NP | SGR-SP |
|-----|--------|--------|--------|
| 3   | 1      | P      | P      |
| 4   | 2      | P      | P      |
| 7   | 3      | P      | P      |
| 9   | 4      | P      | P      |
| 10  | 5      | N      | N      |
| 13  | 6      | N      | N      |
| 15  | 7      | N      | N      |
| 17  | 8      | N      | N      |
| 22  | 9      | N      | N      |
| 27  | 10     | N      | N      |
|     | 11     | PC     | PC     |
|     | 12     | NC     | NC     |

NP

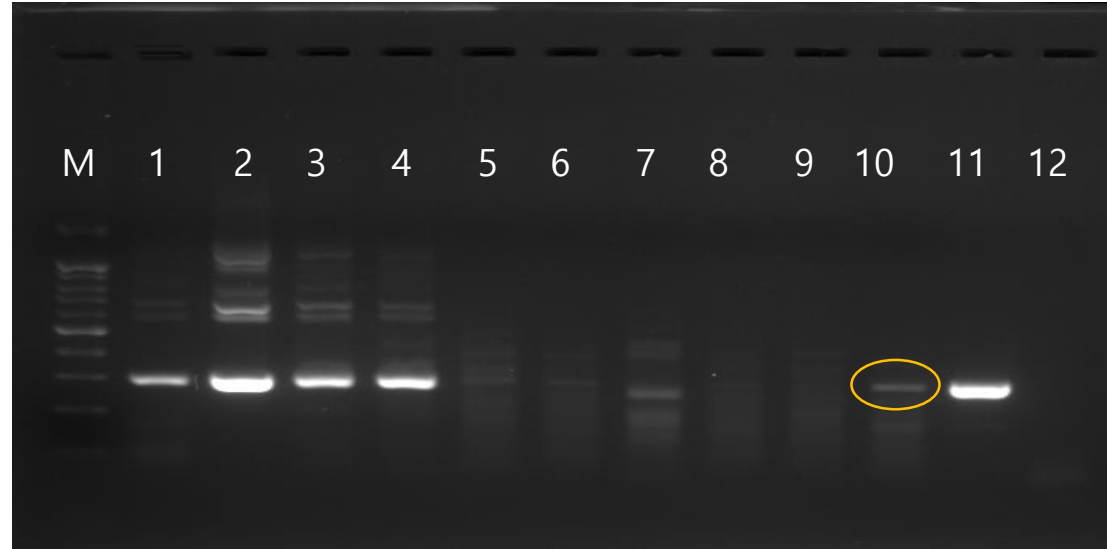

#10 sequencing:  
No significant  
similarity found.

SP

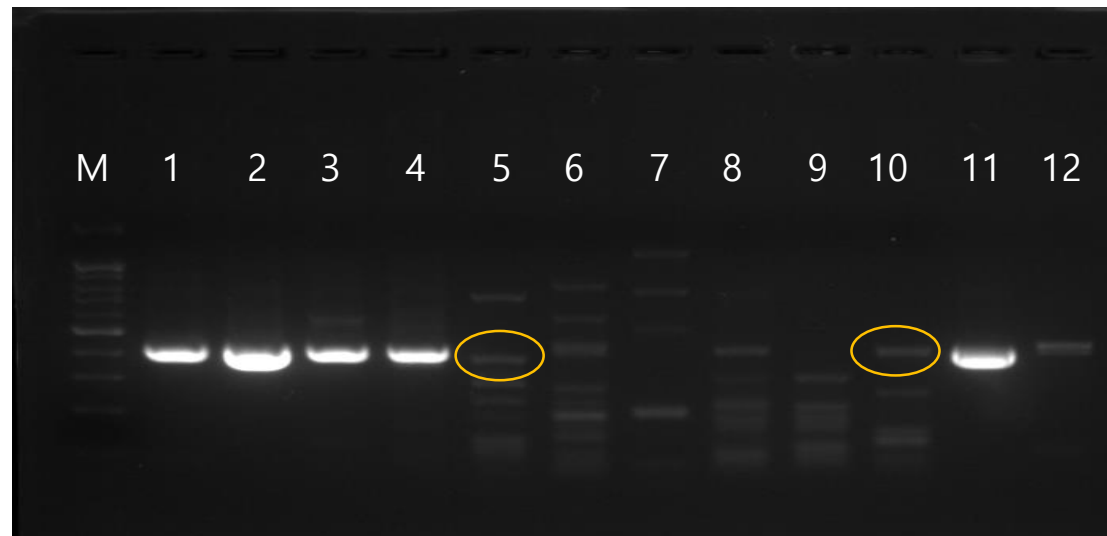

#5 sequencing:  
Homo sapiens  
BAC clone

#10 sequencing:  
No significant  
similarity found.

# Patient 3: sputum

| SOD | Band # | SGR-NP   | SGR-SP   |
|-----|--------|----------|----------|
| 3   | 1      | <b>P</b> | <b>P</b> |
| 4   | 2      | <b>P</b> | <b>P</b> |
| 7   | 3      | <b>P</b> | <b>P</b> |
| 9   | 4      | N        | N        |
| 11  | 5      | N        | N        |
| 13  | 6      | N        | N        |
| 15  | 7      | N        | N        |
| 17  | 8      | N        | N        |
| 22  | 9      | N        | N        |
| 27  | 10     | N        | N        |
|     | 11     | PC       | PC       |
|     | 12     | NC       | NC       |

NP

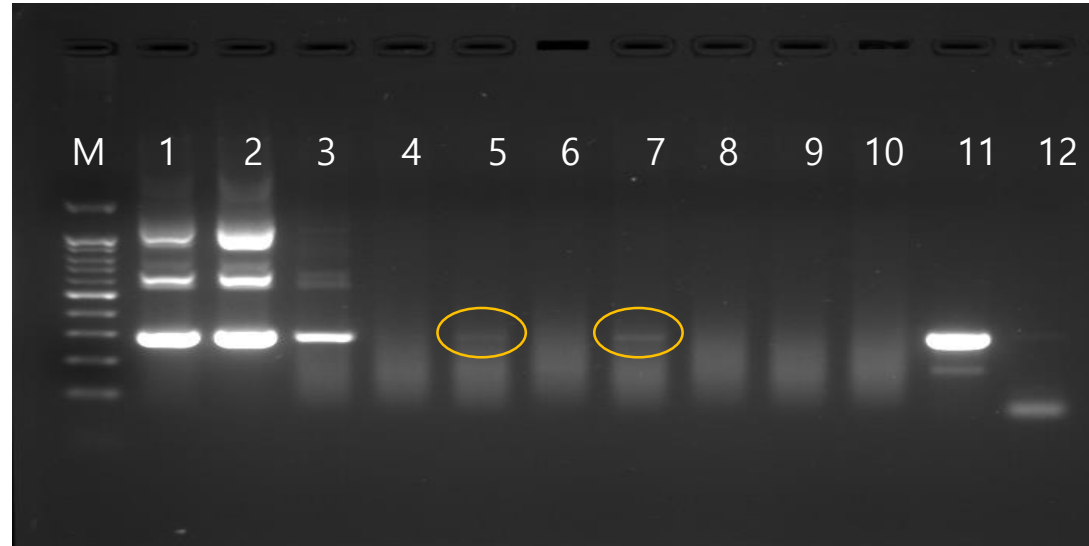

#5 sequencing:  
No significant  
similarity found.

#7 sequencing:  
No significant  
similarity found.

SP

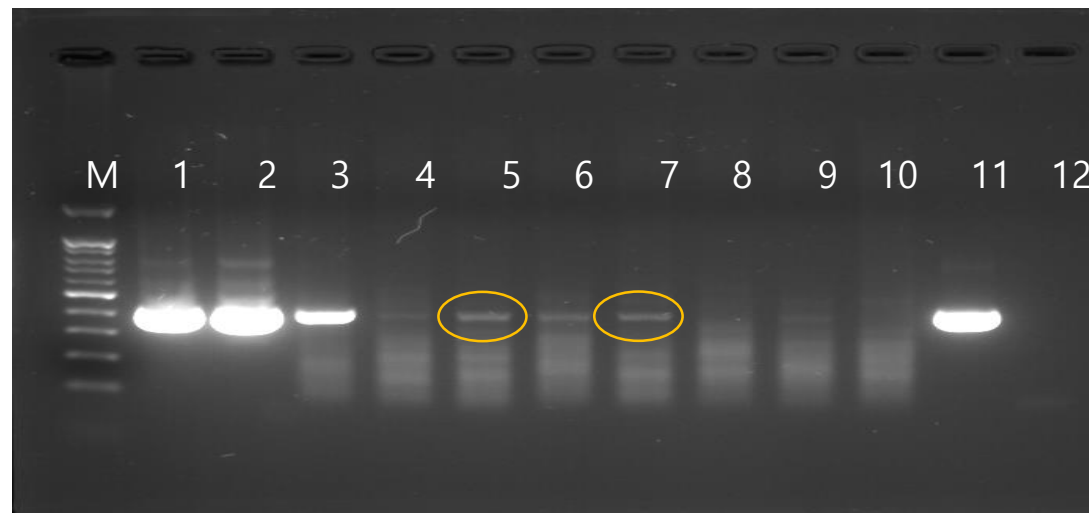

#5 sequencing:  
No significant  
similarity found.

#7 sequencing:  
No significant  
similarity found.

# Patient 3: saliva

| SOD | Band # | SGR-NP | SGR-SP |
|-----|--------|--------|--------|
| 4   | 1      | N      | N      |
| 6   | 2      | N      | N      |
| 9   | 3      | N      | N      |
| 11  | 4      | N      | N      |
| 13  | 5      | N      | N      |
| 15  | 6      | N      | N      |
| 17  | 7      | N      | N      |
| 22  | 8      | N      | N      |
| 27  | 9      | N      | N      |
|     | 10     | PC     | PC     |
|     | 11     | NC     | NC     |

NP

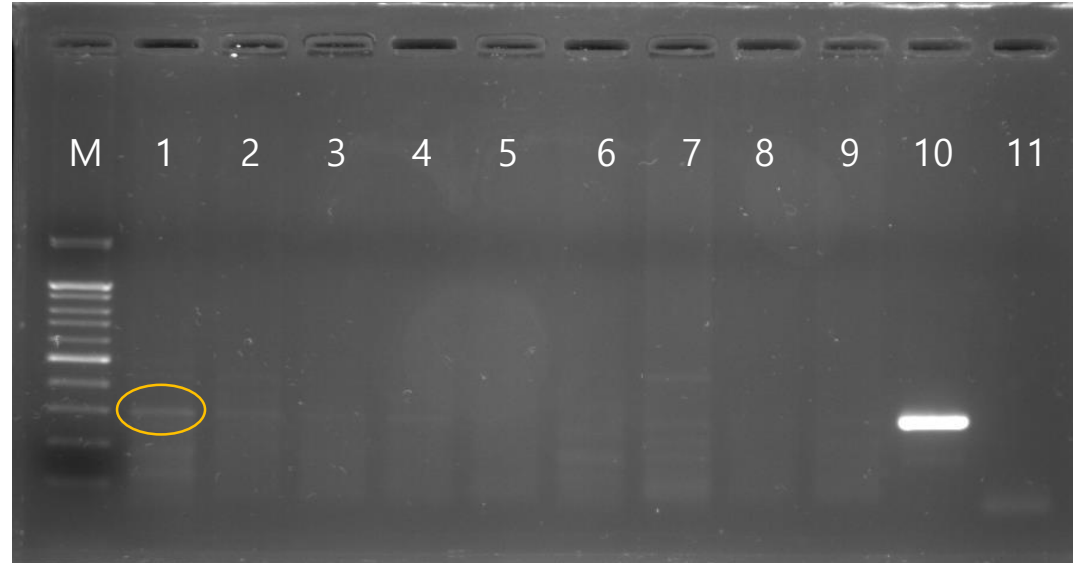

#01 sequencing:  
No significant  
similarity found.

SP

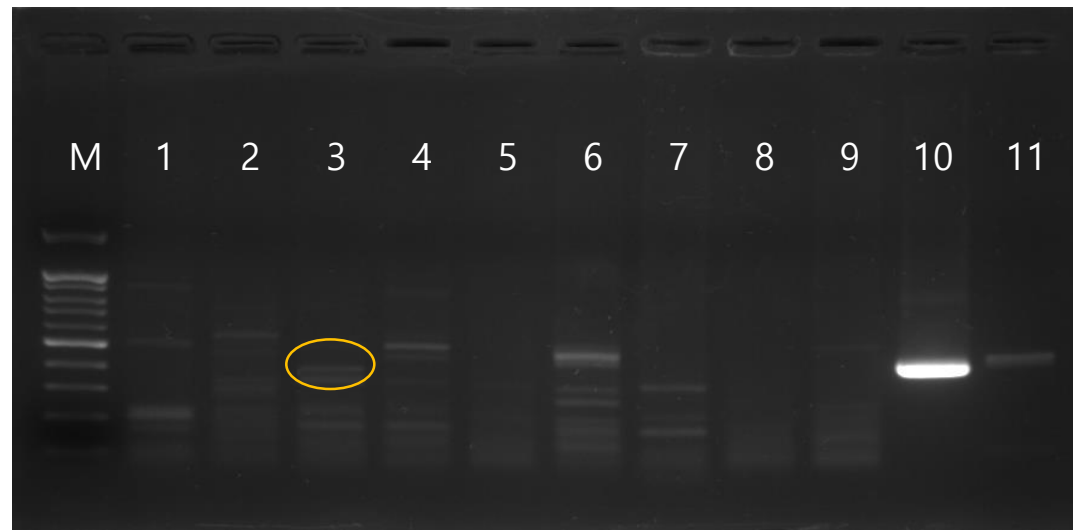

#3 sequencing:  
No significant  
similarity found.

# Patient 4: NP

| SOD | Band # | SGR-NP   | SGR-SP   |
|-----|--------|----------|----------|
| 4   | 1      | <b>P</b> | <b>P</b> |
| 6   | 2      | <b>P</b> | <b>P</b> |
| 8   | 3      | <b>P</b> | <b>P</b> |
| 10  | 4      | N        | N        |
| 13  | 5      | N        | N        |
| 15  | 6      | N        | N        |
| 24  | 7      | N        | N        |
| 28  | 8      | N        | N        |
|     | 9      | PC       | PC       |
|     | 10     | NC       | NC       |

NP

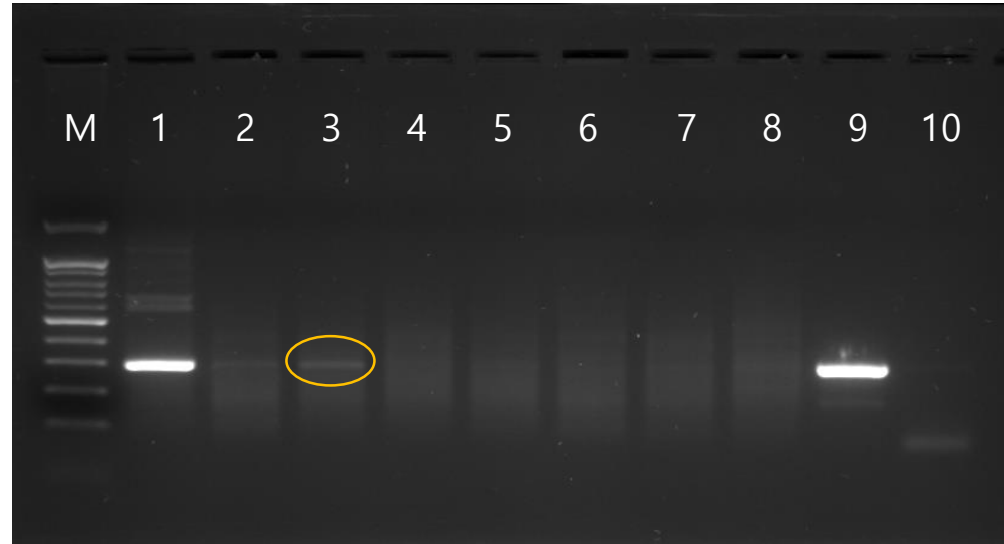

#03 sequencing:  
SARS-CoV-2

SP

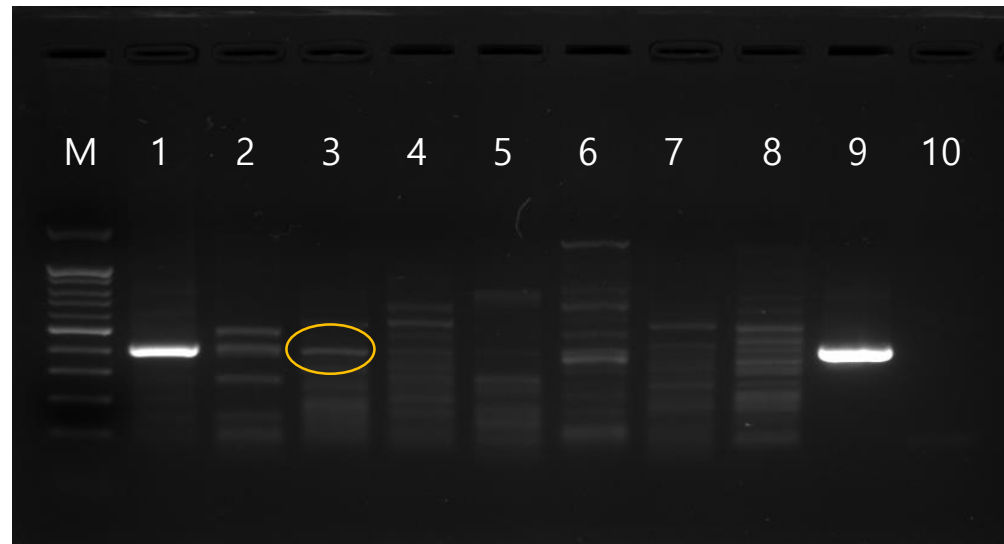

#03 sequencing:  
SARS-CoV-2

# Patient 4: Sputum

| SOD | Band # | SGR-NP   | SGR-SP   |
|-----|--------|----------|----------|
| 4   | 1      | <b>P</b> | <b>P</b> |
| 6   | 2      | <b>P</b> | <b>P</b> |
| 8   | 3      | N        | N        |
| 10  | 4      | N        | N        |
| 16  | 5      | N        | N        |
| 18  | 6      | N        | N        |
| 21  | 7      | N        | N        |
| 24  | 8      | N        | N        |
|     | 9      | PC       | PC       |
|     | 10     | NC       | NC       |

NP

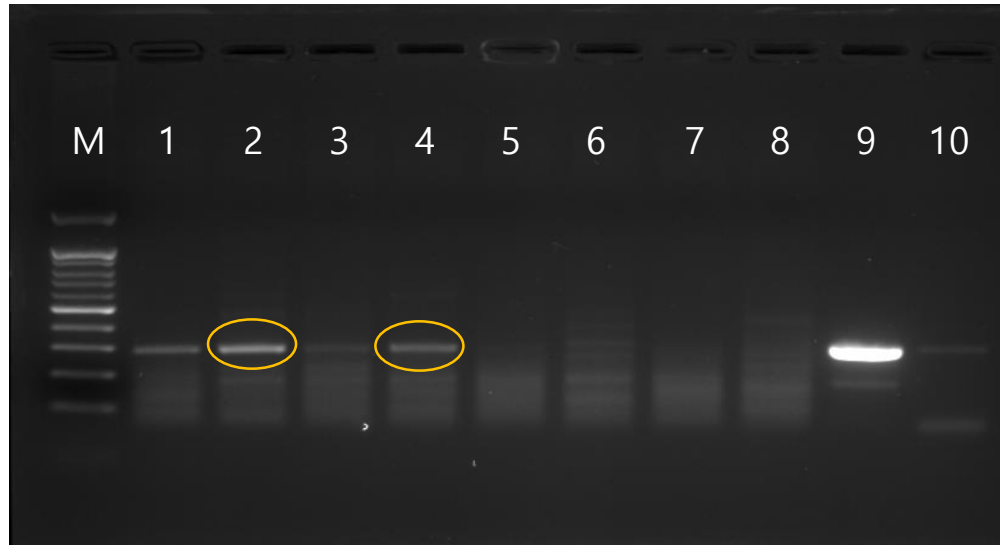

SP

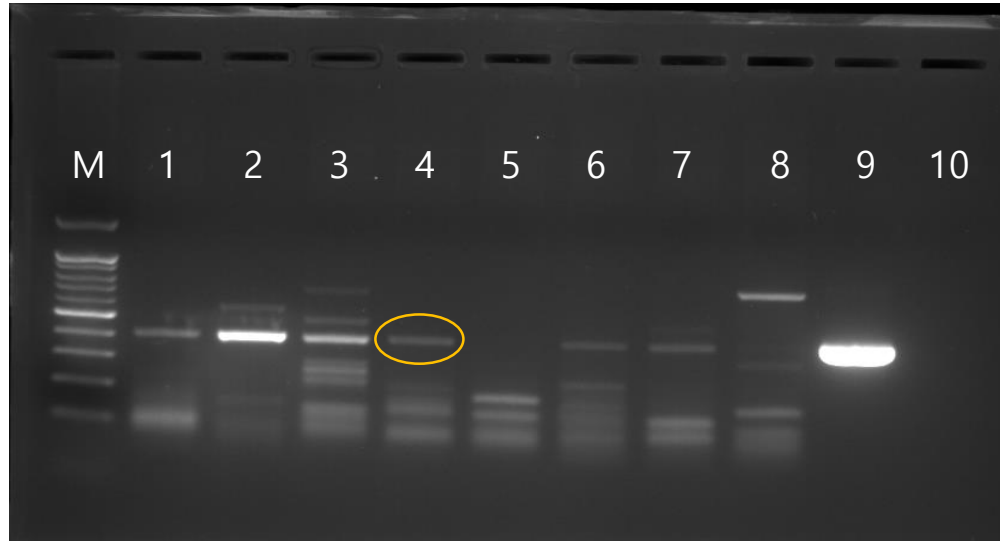

# Patient 4: Saliva

| SOD | Band # | SGR-NP   | SGR-SP   |
|-----|--------|----------|----------|
| 4   | 1      | <b>P</b> | <b>P</b> |
| 6   | 2      | <b>P</b> | <b>P</b> |
| 9   | 3      | N        | N        |
| 11  | 4      | N        | N        |
| 15  | 5      | N        | N        |
| 18  | 6      | N        | N        |
| 21  | 7      | N        | N        |
| 28  | 8      | N        | N        |
|     | 9      | PC       | PC       |
|     | 10     | NC       | NC       |

NP

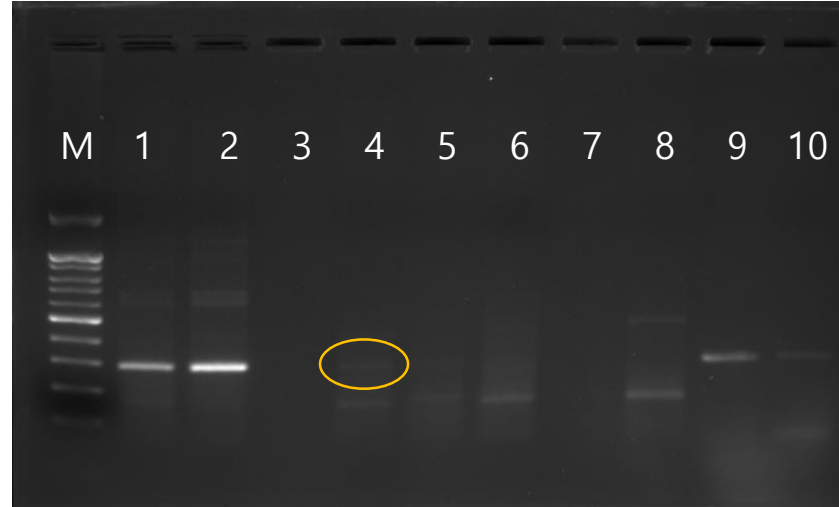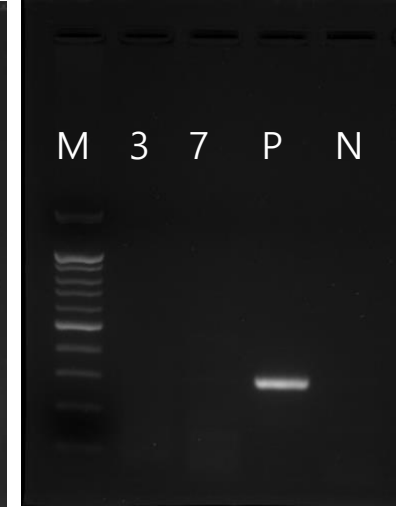

#04 sequencing:  
No significant similarity found.

SP

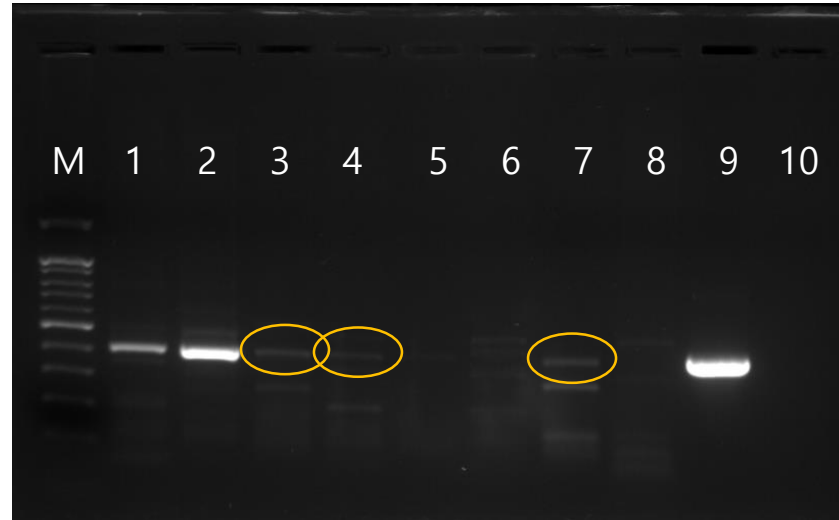

#03, 04, 07 sequencing:  
No significant similarity found.

# Patient 5: NP

| SOD | Band # | SGR-NP | SGR-SP |
|-----|--------|--------|--------|
| 1   | 1      | P      | P      |
| 5   | 2      | P      | P      |
| 9   | 3      | P      | P      |
| 11  | 4      | P      | P      |
| 13  | 5      | P      | P      |
| 16  | 6      | P      | P      |
| 19  | 7      | P      | P      |
| 33  | 8      | P      | P      |
| 35  | 9      | P      | P      |
| 38  | 10     | P      | N      |
| 40  | 11     | N      | N      |
| 42  | 12     | N      | N      |
| 44  | 13     | N      | N      |
| 47  | 14     | N      | N      |
|     | 15     | PC     | PC     |
|     | 16     | NC     | NC     |

NP

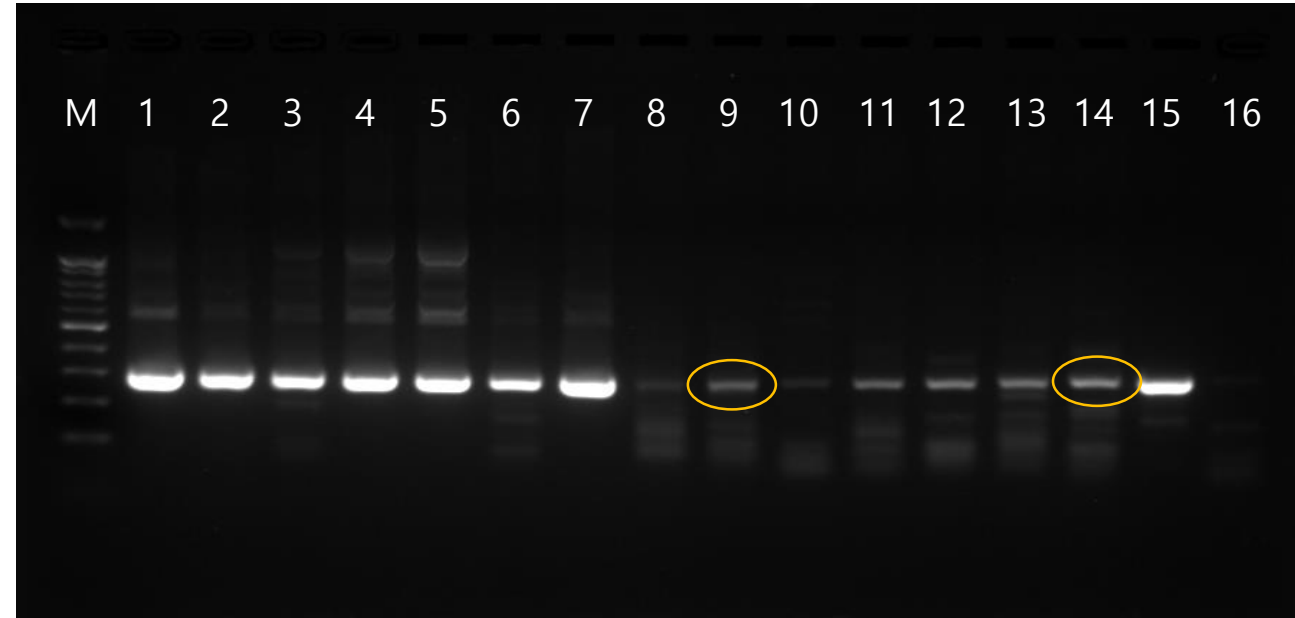

SP

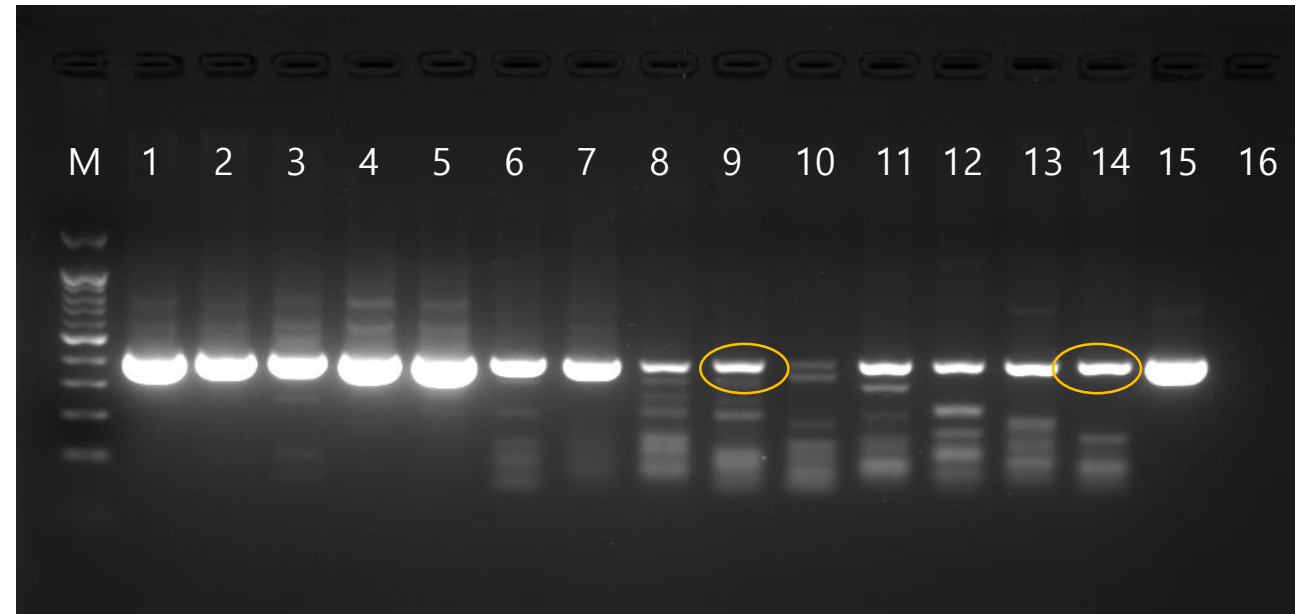

#11-14 sequencing: No significant similarity found.



# Patient 5: sputum

| SOD | Band # | SGR-NP | SGR-SP |
|-----|--------|--------|--------|
| 1   | 1      | P      | P      |
| 5   | 2      | P      | P      |
| 9   | 3      | P      | P      |
| 11  | 4      | P      | P      |
| 13  | 5      | P      | P      |
| 16  | 6      | P      | P      |
| 19  | 7      | P      | P      |
| 33  | 8      | N      | N      |
| 35  | 9      | N      | N      |
| 38  | 10     | N      | N      |
| 40  | 11     | N      | N      |
| 42  | 12     | N      | N      |
| 44  | 13     | N      | N      |
| 47  | 14     | N      | N      |
|     | 15     | PC     | PC     |
|     | 16     | NC     | NC     |

NP

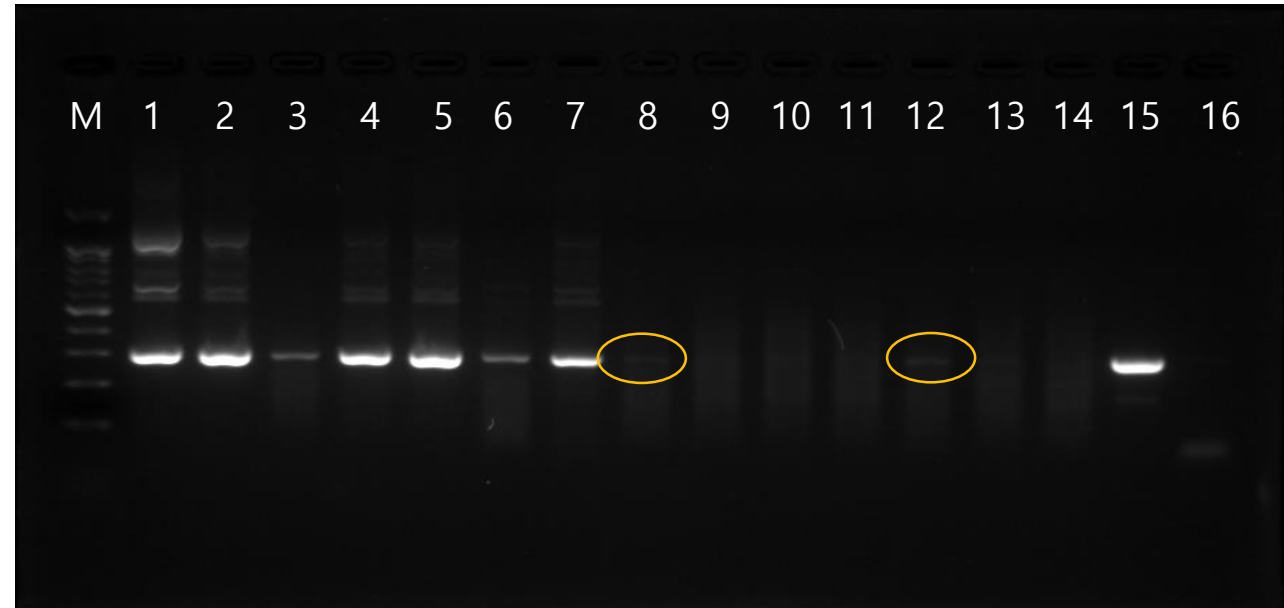

#08 sequencing:  
No signal

#12 sequencing:  
No signal

SP

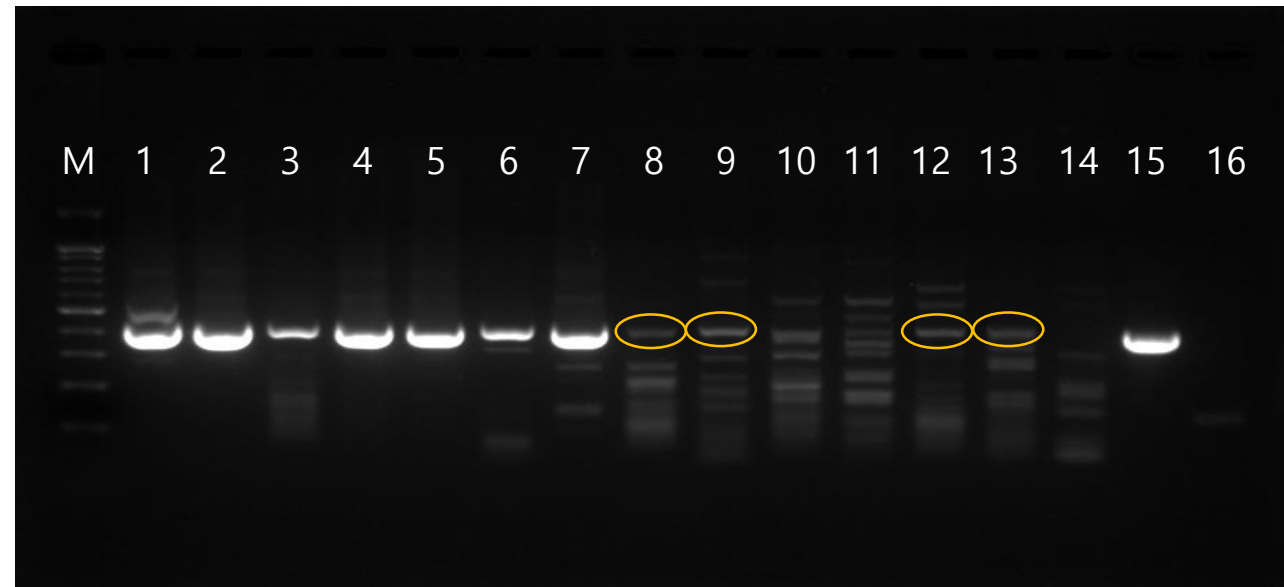

#08, 09  
sequencing: No  
significant  
similarity found.

#12, 13  
sequencing:  
No significant  
similarity found.

# Patient 5: Saliva

| SOD | Band # | SGR-NP | SGR-SP |
|-----|--------|--------|--------|
| 1   | 1      | P      | P      |
| 5   | 2      | P      | P      |
| 9   | 3      | P      | P      |
| 11  | 4      | P      | P      |
| 13  | 5      | P      | P      |
| 16  | 6      | P      | P      |
| 19  | 7      | N      | N      |
| 33  | 8      | N      | N      |
| 35  | 9      | P      | P      |
| 38  | 10     | N      | N      |
| 40  | 11     | N      | N      |
| 42  | 12     | N      | N      |
| 44  | 13     | N      | N      |
| 47  | 14     | N      | N      |
|     | 15     | PC     | PC     |
|     | 16     | NC     | NC     |

NP

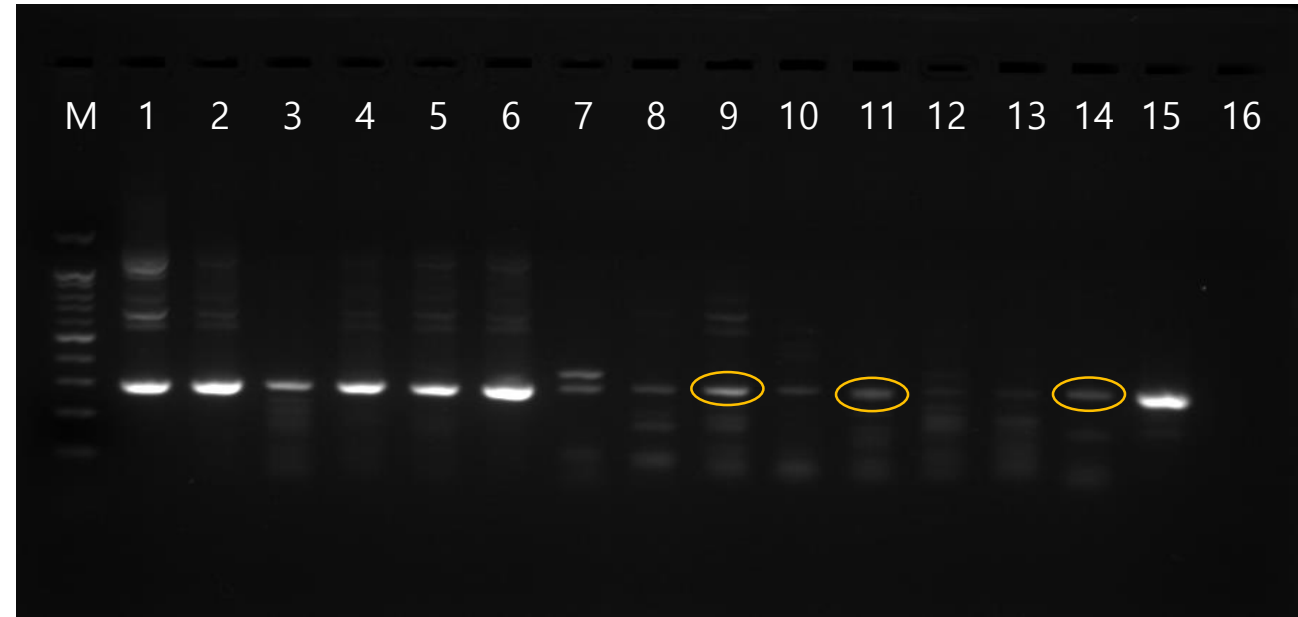

#09 sequencing:  
SARS-CoV-2

#11, 14  
sequencing: No  
significant  
similarity found.

SP

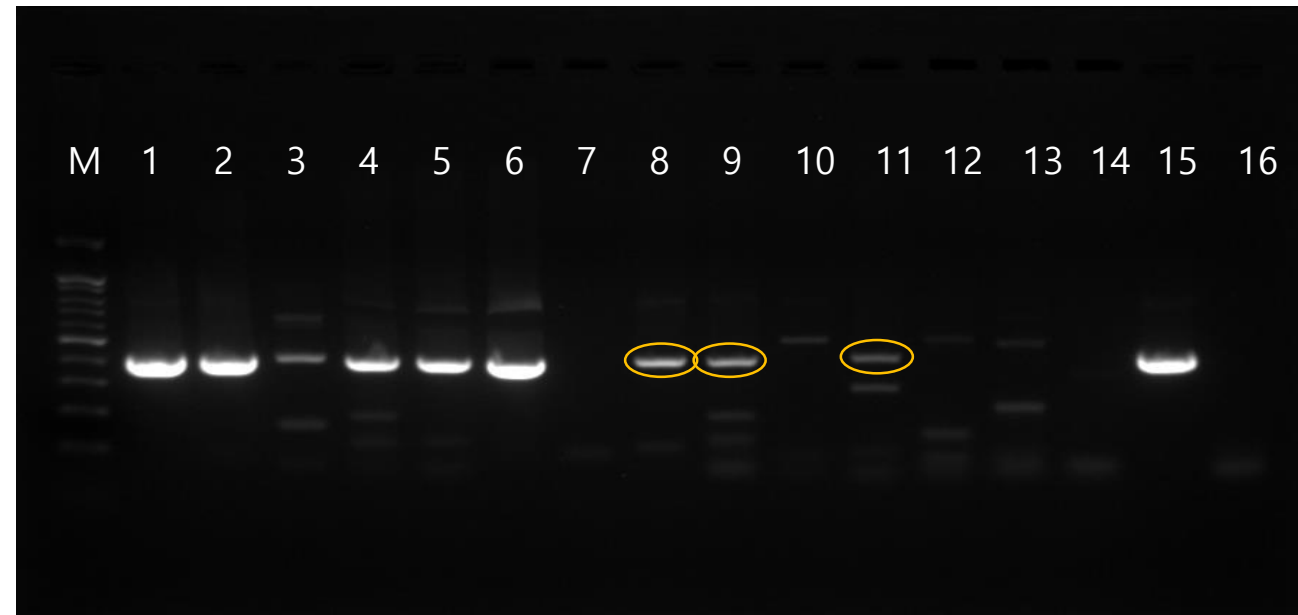

#09 sequencing:  
SARS-CoV-2

#11 sequencing:  
No significant  
similarity found.

# Patient 6: Sputum, NP

| Specimen | SOD | Band # | SGR-NP | SGR-SP |
|----------|-----|--------|--------|--------|
| Sputum   | 0   | 1      | P      | P      |
| Sputum   | 1   | 2      | P      | P      |
| Sputum   | 5   | 3      | P      | P      |
| Sputum   | 10  | 4      | P      | P      |
| Sputum   | 14  | 5      | P      | P      |
| Sputum   | 35  | 6      | P      | P      |
| Sputum   | 38  | 7      | P      | P      |
| Sputum   | 41  | 8      | P      | P      |
| Sputum   | 44  | 9      | P      | P      |
| NP       | 35  | 10     | P      | P      |
| NP       | 45  | 11     | P      | P      |
|          | 42  | 12     | PC     | PC     |
|          | 44  | 13     | NC     | NC     |

NP

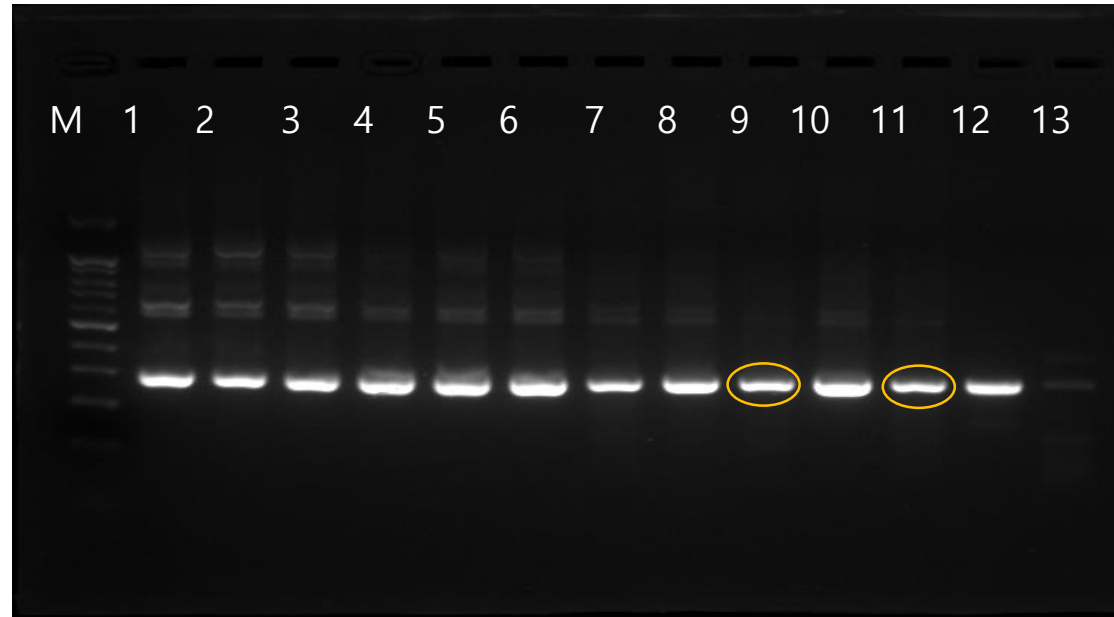

#09 sequencing:  
SARS-CoV-2

#11 sequencing:  
SARS-CoV-2

SP

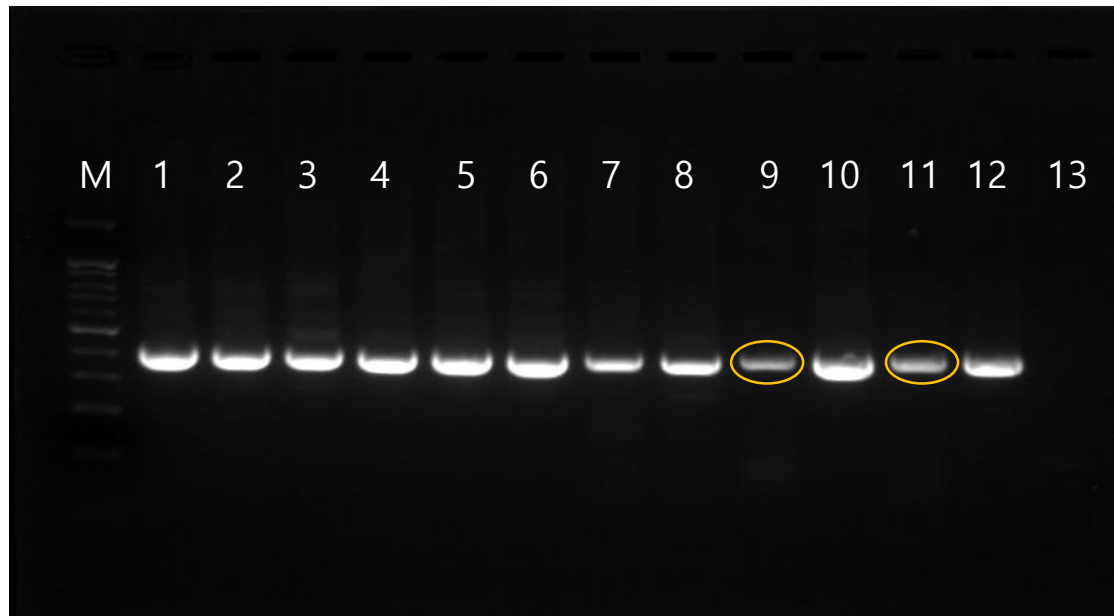

#09 sequencing:  
SARS-CoV-2

#11 sequencing:  
SARS-CoV-2

# Patient 6: Saliva

| SOD | Band# | SGR-NP | SGR-SP |
|-----|-------|--------|--------|
| 0   | 1     | P      | P      |
| 1   | 2     | P      | P      |
| 5   | 3     | P      | P      |
| 10  | 4     | P      | P      |
| 14  | 5     | P      | P      |
| 35  | 6     | P      | P      |
| 38  | 7     | P      | P      |
| 41  | 8     | P      | P      |
| 44  | 9     | P      | P      |
|     | 10    | PC     | PC     |
|     | 11    | NC     | NC     |

NP

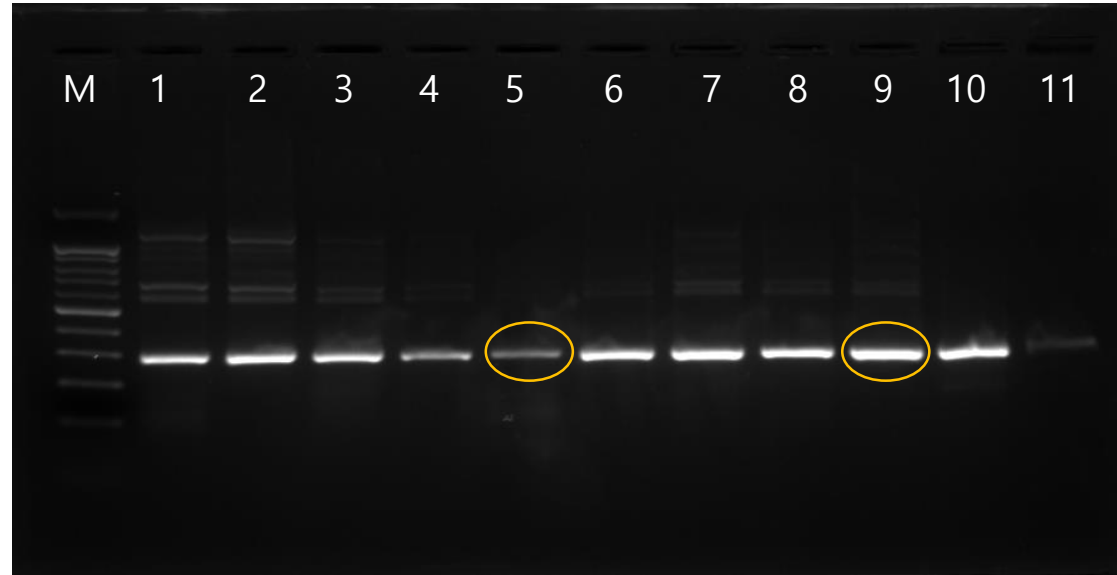

#05 sequencing:  
SARS-CoV-2

#09 sequencing:  
SARS-CoV-2

SP

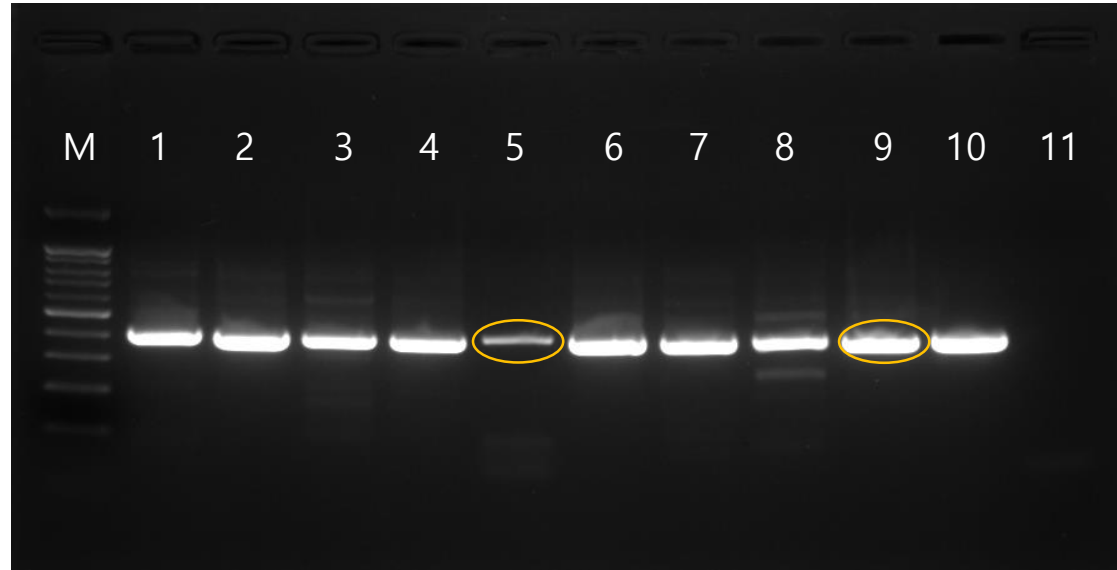

#05 sequencing:  
SARS-CoV-2

#09 sequencing:  
SARS-CoV-2

# Patient 7: NP

| SOD | Band# | SGR-NP | SGR-SP |
|-----|-------|--------|--------|
| 3   | 1     | P      | P      |
| 6   | 2     | P      | P      |
| 8   | 3     | P      | P      |
| 11  | 4     | P      | P      |
| 13  | 5     | N      | N      |
| 17  | 6     | N      | N      |
|     | 10    | PC     | PC     |
|     | 11    | NC     | NC     |

NP

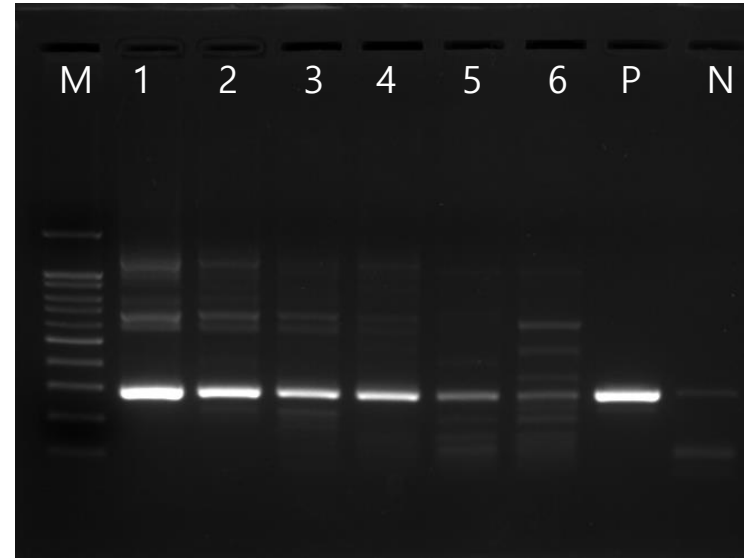

#05, 06 sequencing: No significant similarity found.

SP

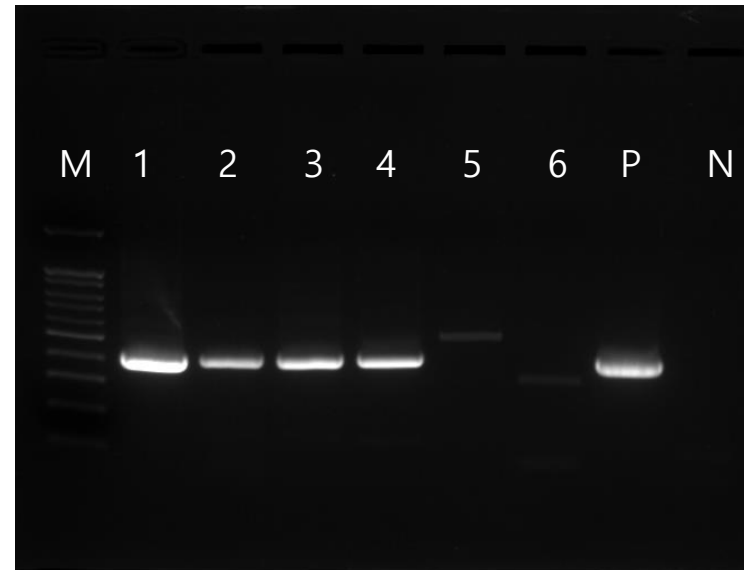

# Patient 8: Sputum

| SOD | Band# | SGR-NP | SGR-SP |
|-----|-------|--------|--------|
| 2   | 1     | P      | P      |
| 4   | 2     | P      | P      |
| 6   | 3     | P      | P      |
| 8   | 4     | P      | P      |
| 10  | 5     | P      | P      |
| 12  | 6     | N      | N      |
| 14  | 7     | N      | N      |
| 16  | 8     | N      | N      |
|     | 9     | PC     | PC     |
|     | 10    | NC     | NC     |

NP

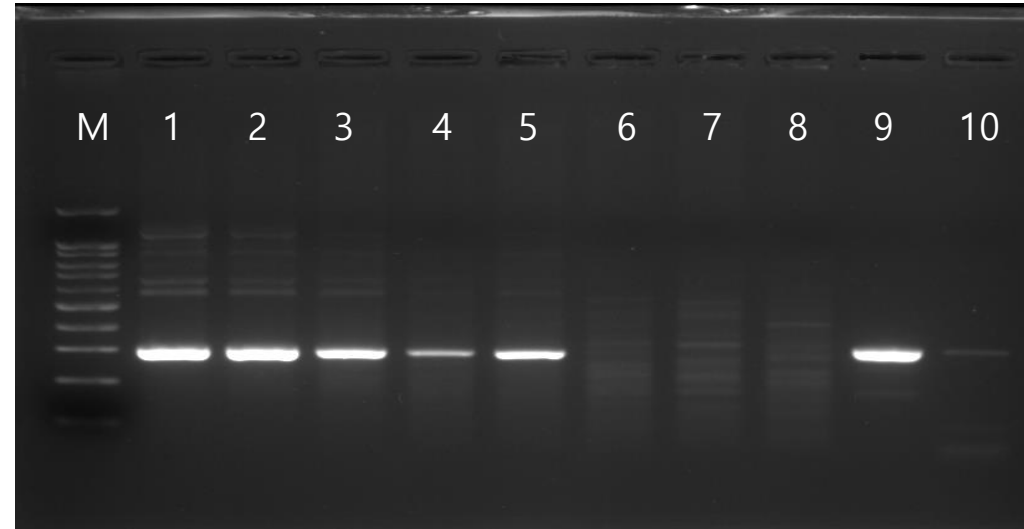

SP

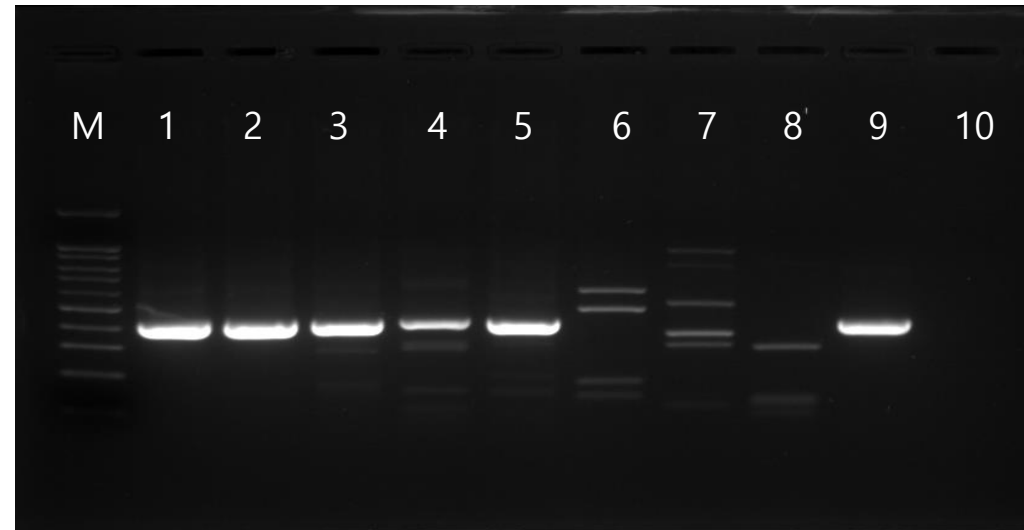

# Patient 8: Saliva

| SOD | Band# | SGR-NP | SGR-SP |
|-----|-------|--------|--------|
| 2   | 1     | P      | P      |
| 4   | 2     | P      | P      |
| 6   | 3     | P      | P      |
| 8   | 4     | N      | N      |
| 10  | 5     | N      | N      |
| 12  | 6     | N      | N      |
| 14  | 7     | N      | N      |
| 16  | 8     | N      | N      |
|     | 9     | PC     | PC     |
|     | 10    | NC     | NC     |

NP

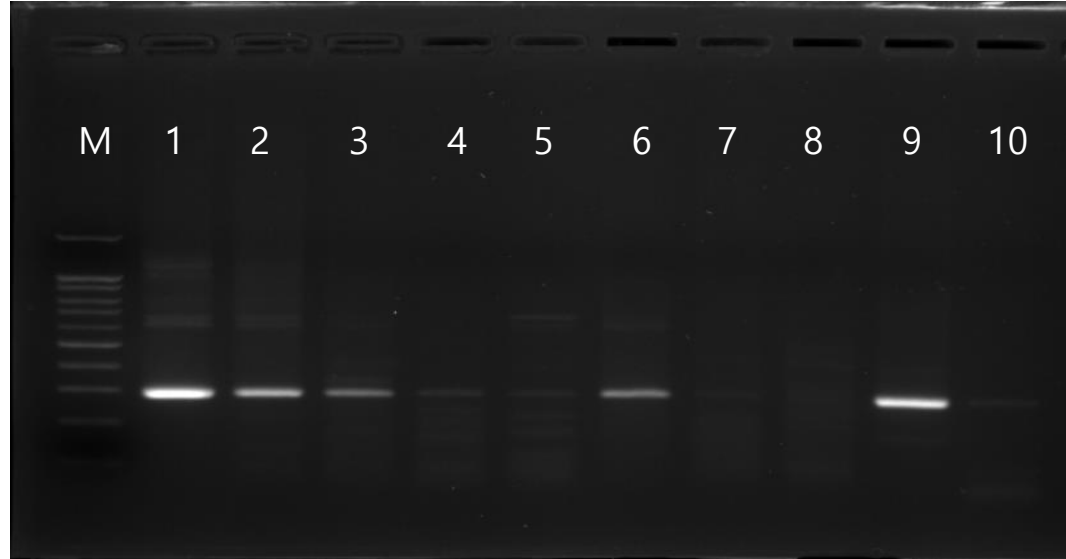

#04, 05, 06  
sequencing: No  
significant similarity  
found.

SP

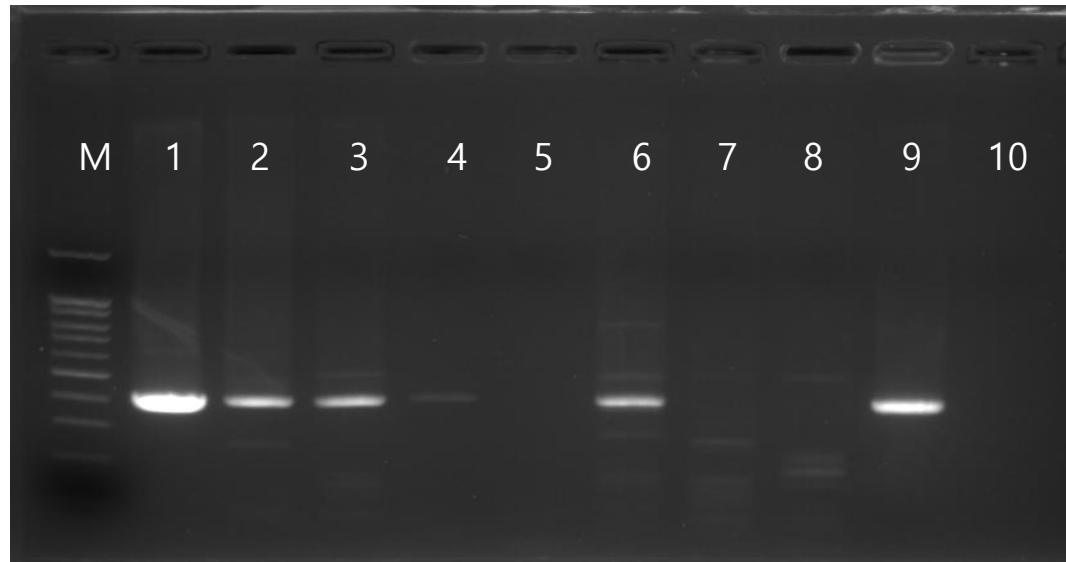

# Patient 9: NP

| SOD | Band# | SGR-NP | SGR-SP |
|-----|-------|--------|--------|
| 2   | 1     | P      | P      |
| 4   | 2     | N      | N      |
| 6   | 3     | N      | N      |
| 7   | 4     | N      | N      |
| 9   | 5     | N      | N      |
| 13  | 6     | N      | N      |
| 15  | 7     | N      | N      |
| 22  | 8     | N      | N      |
|     | 9     | PC     | PC     |
|     | 10    | NC     | NC     |

NP

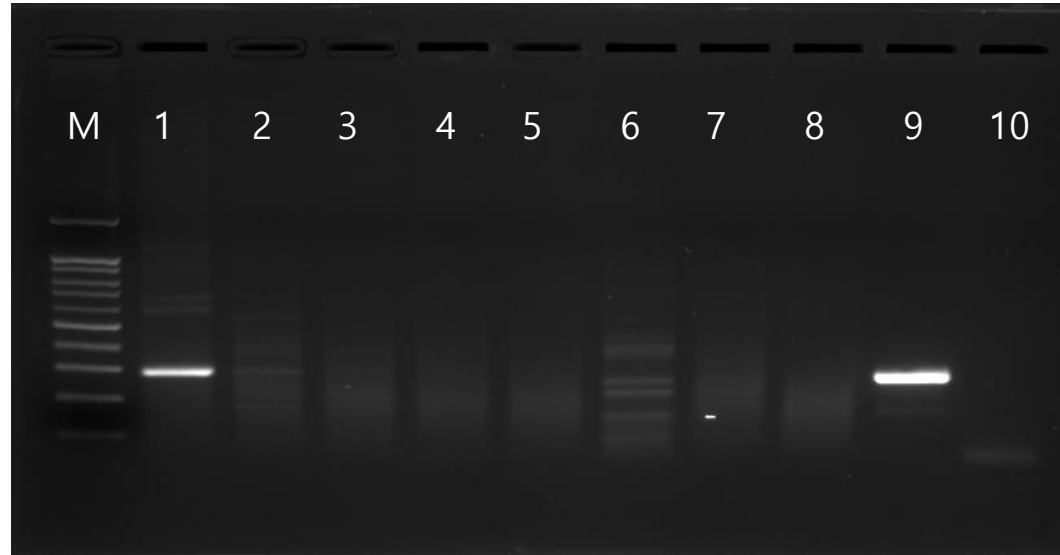

#01, 02 sequencing:  
SARS-CoV-2 99%

#06 sequencing:  
Human DNA

SP

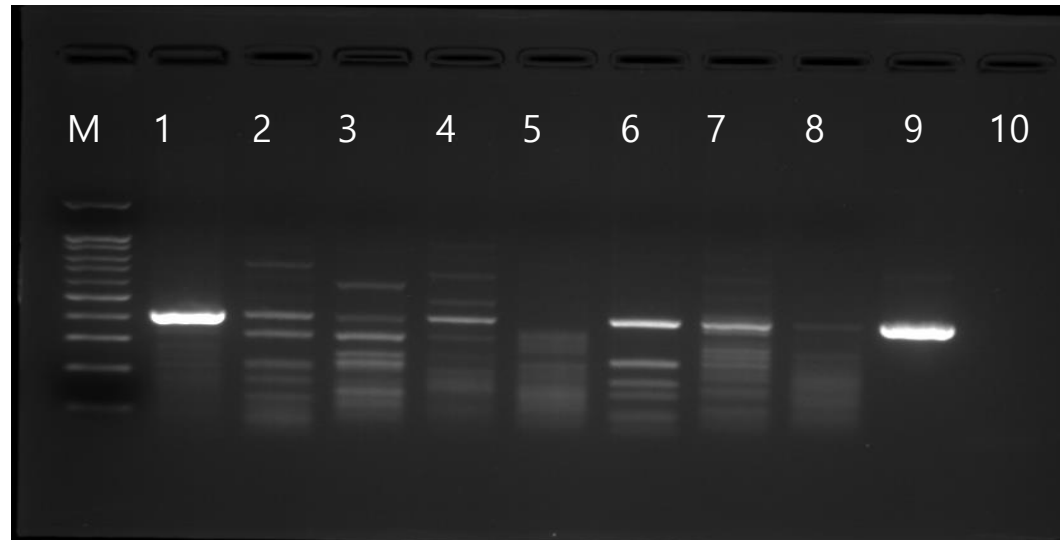



# Patient 9: sputum

| SOD | Band# | SGR-NP | SGR-SP |
|-----|-------|--------|--------|
| 2   | 1     | P      | P      |
| 4   | 2     | N      | N      |
| 6   | 3     | N      | N      |
| 7   | 4     | N      | N      |
| 9   | 5     | N      | N      |
| 13  | 6     | N      | N      |
| 15  | 7     | N      | N      |
| 22  | 8     | N      | N      |
|     | 9     | PC     | PC     |
|     | 10    | NC     | NC     |

NP

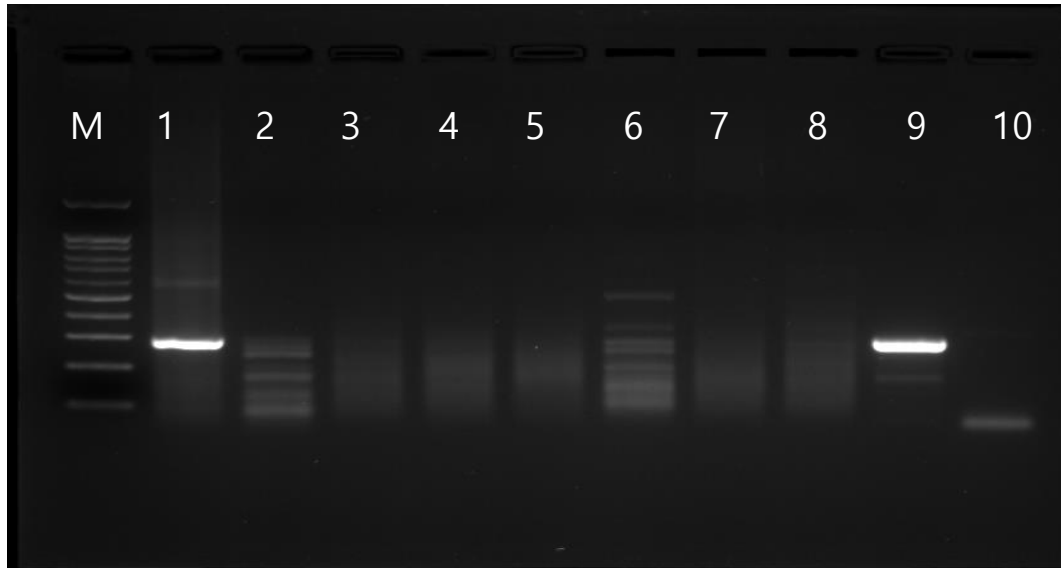

#01 sequencing:  
SARS-CoV-2 100%

SP

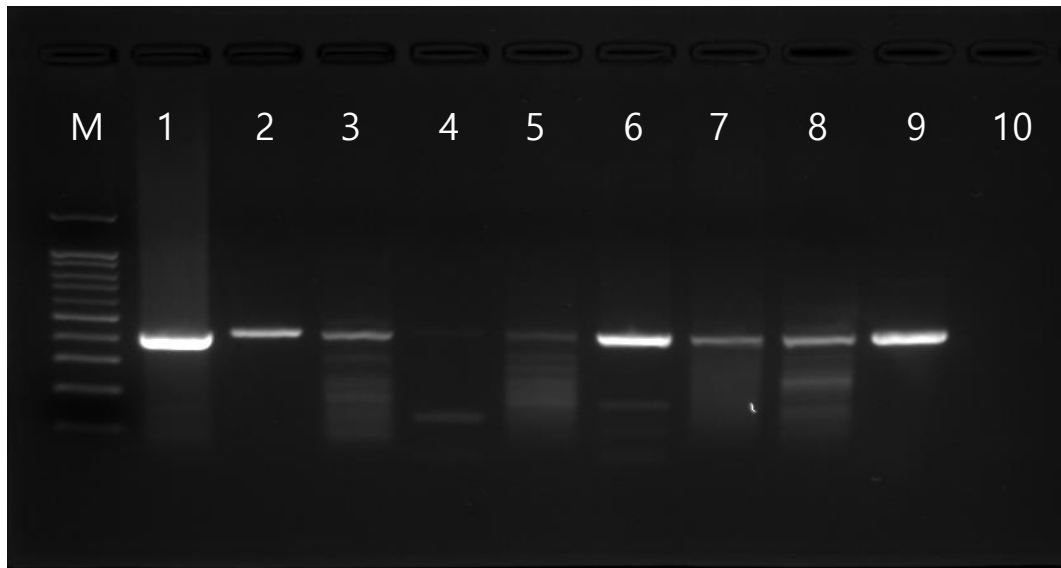

#02-08 sequencing:  
no significant  
similarity found.

# Patient 9: saliva

| SOD | Band# | SGR-NP | SGR-SP |
|-----|-------|--------|--------|
| 2   | 1     | P      | P      |
| 4   | 2     | N      | N      |
| 6   | 3     | N      | N      |
| 7   | 4     | N      | N      |
| 9   | 5     | N      | N      |
| 13  | 6     | N      | N      |
| 15  | 7     | N      | N      |
| 22  | 8     | N      | N      |
|     | 9     | PC     | PC     |
|     | 10    | NC     | NC     |

NP

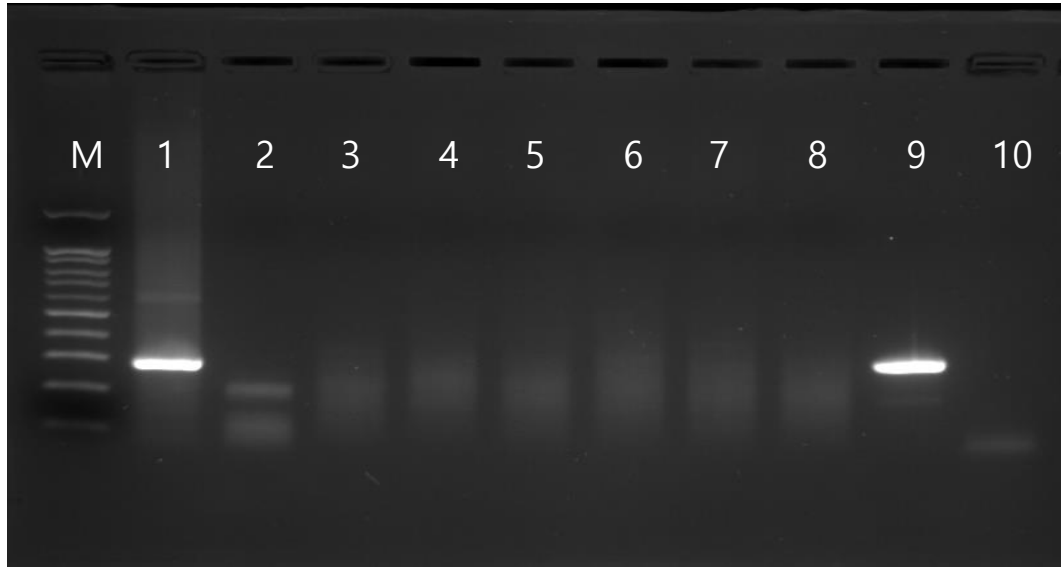

#01 sequencing:  
SARS-CoV-2 100%

SP

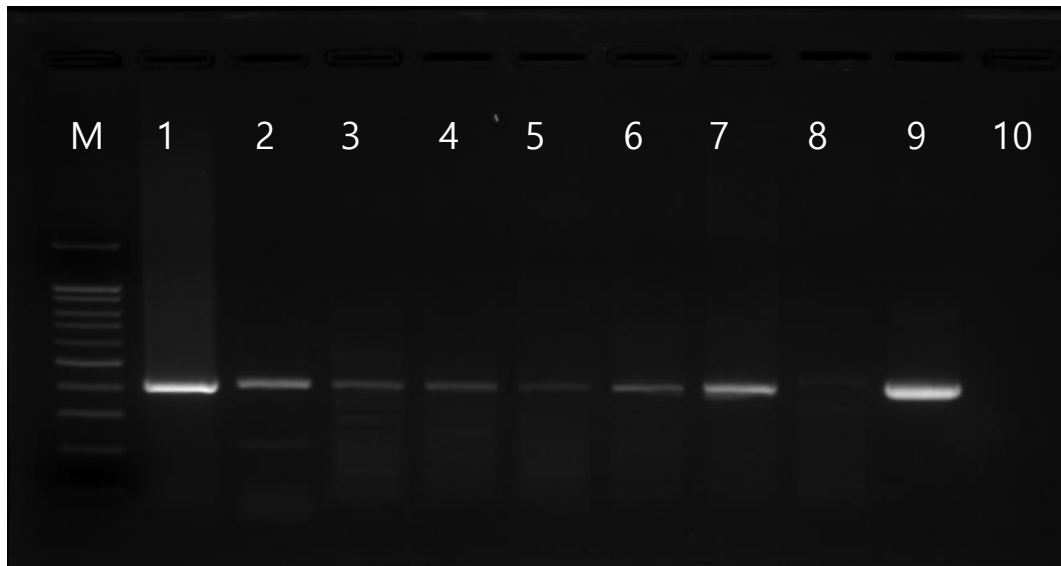

#01 sequencing:  
SARS-CoV-2 100%

#02-07: no  
significant similarity  
found.

# Patient 10: NP

| SOD | Band# | SGR-NP | SGR-SP |
|-----|-------|--------|--------|
| 9   | 1     | P      | P      |
| 12  | 2     | P      | P      |
| 14  | 3     | P      | P      |
| 17  | 4     | P      | P      |
| 19  | 5     | N      | N      |
| 21  | 6     | N      | N      |
| 23  | 7     | N      | N      |
| 28  | 8     | N      | N      |
|     | 9     | PC     | PC     |
|     | 10    | NC     | NC     |

NP

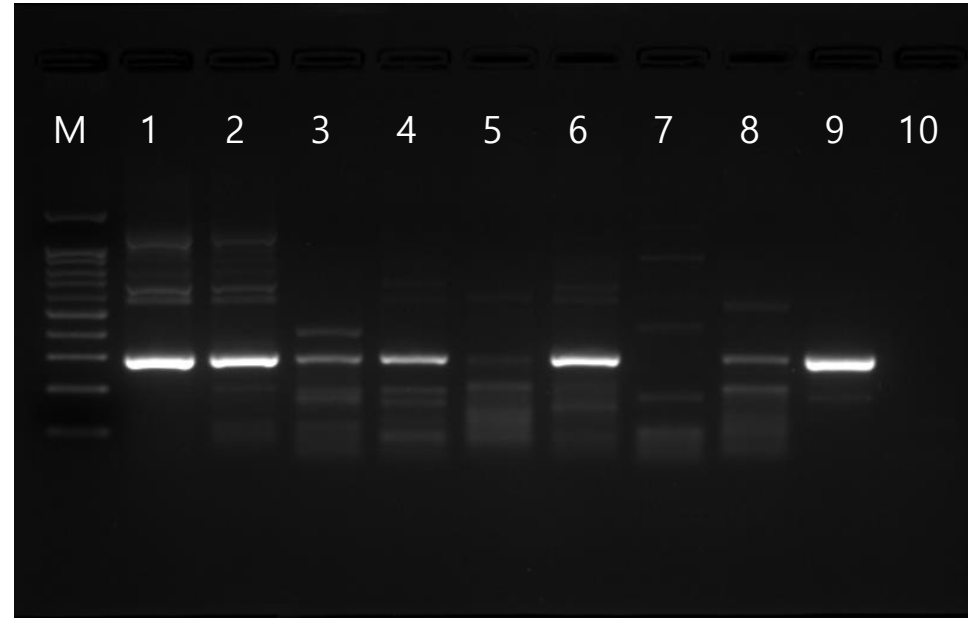

SP

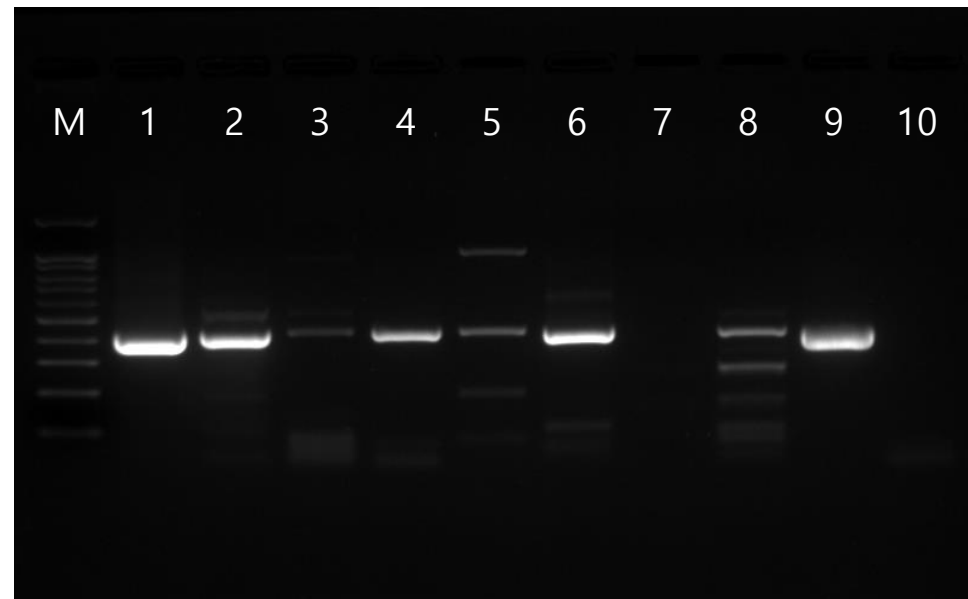

# Patient 10: Sputum

| SOD | Band# | SGR-NP | SGR-SP |
|-----|-------|--------|--------|
| 9   | 1     | P      | P      |
| 12  | 2     | P      | P      |
| 14  | 3     | N      | N      |
| 17  | 4     | N      | N      |
| 19  | 5     | N      | N      |
| 21  | 6     | N      | N      |
| 23  | 7     | N      | N      |
| 28  | 8     | N      | N      |
|     | 9     | PC     | PC     |
|     | 10    | NC     | NC     |

NP

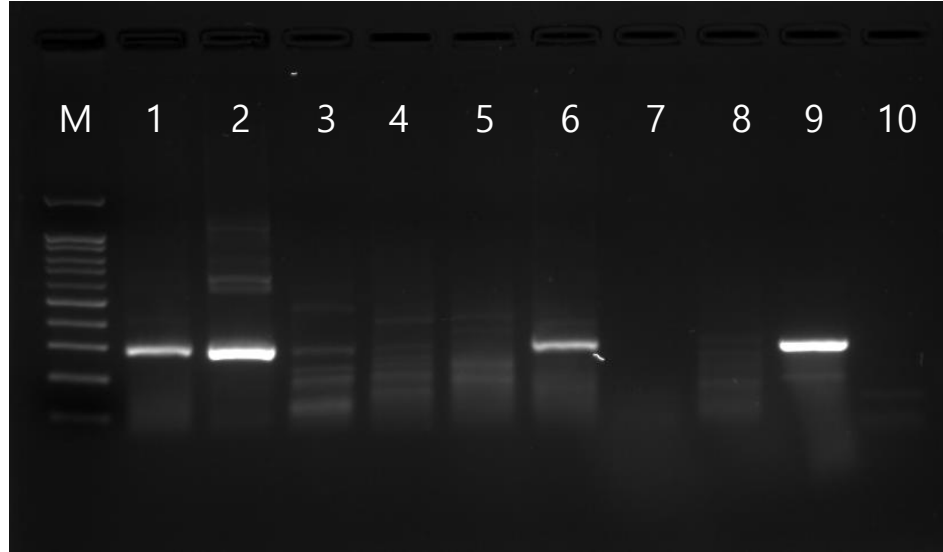

SP

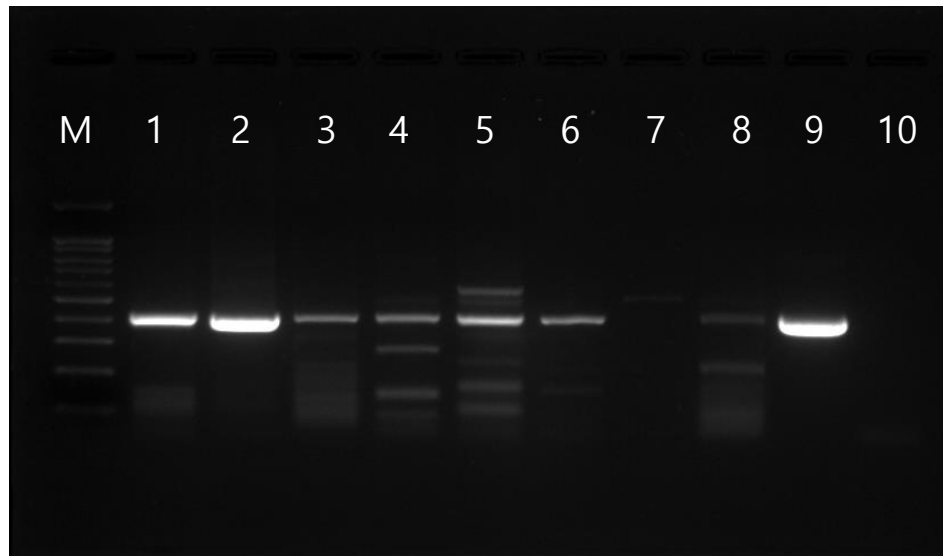

# Patient 11

| Specimen | SOD | Band # | SGR-NP | SGR-SP |
|----------|-----|--------|--------|--------|
| NP       | 3   | 1      | P      | P      |
| NP       | 5   | 2      | P      | P      |
| NP       | 8   | 3      | P      | P      |
| NP       | 9   | 4      | P      | P      |
| NP       | 14  | 5      | N      | N      |
| Sputum   | 5   | 6      | P      | P      |
| Sputum   | 7   | 7      | P      | P      |
| Sputum   | 8   | 8      | P      | P      |
| Sputum   | 9   | 9      | P      | N      |
| Saliva   | 5   | 10     | P      | P      |
| Saliva   | 16  | 11     | N      | N      |

\*SP-9: not sequenced

N gene

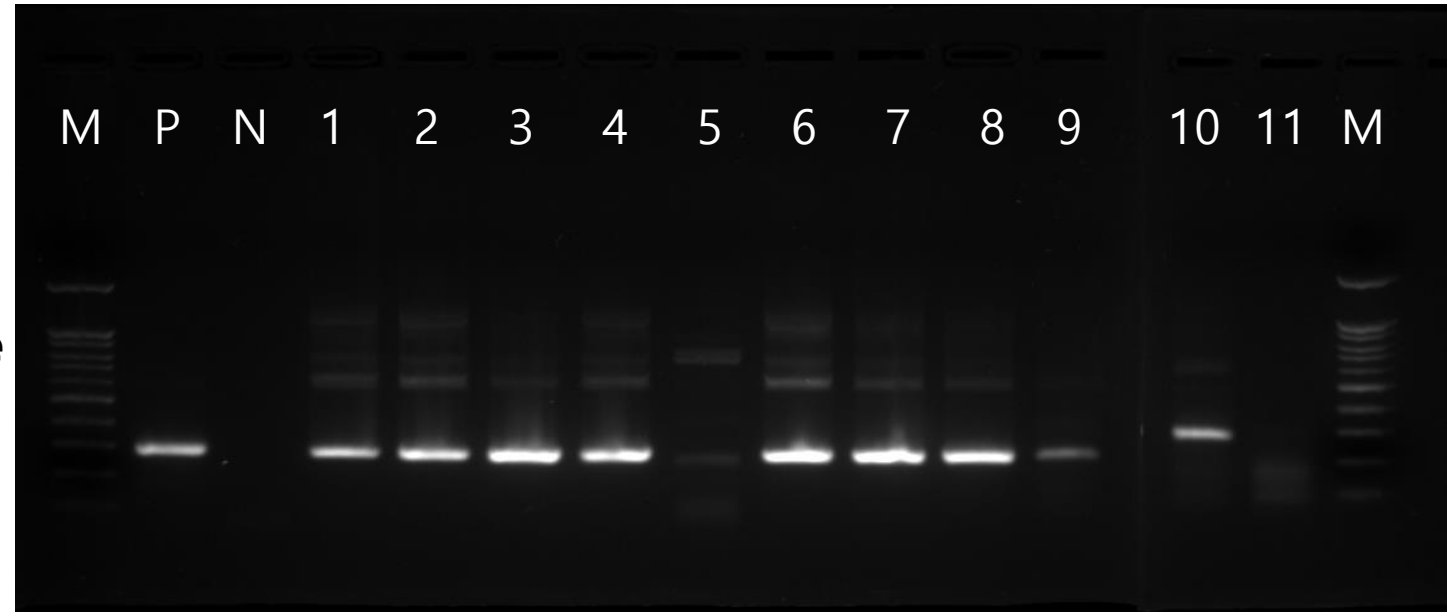

S gene

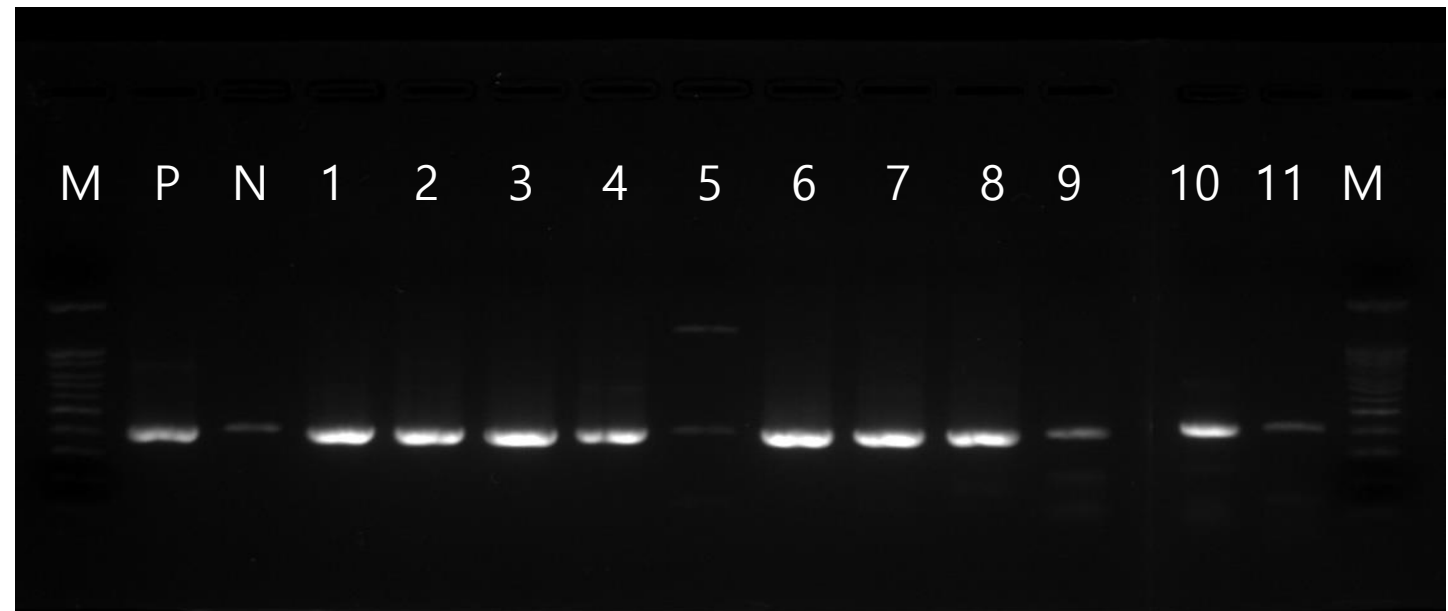

# Patient 12

| Specimen | SOD | Band # | SGR-NP | SGR-SP |
|----------|-----|--------|--------|--------|
| NP       | 1   | 1      | P      | P      |
| NP       | 2   | 2      | P      | P      |
| NP       | 4   | 3      | P      | P      |
| NP       | 7   | 4      | P      | P      |
| NP       | 9   | 5      | N      | N      |
| NP       | 16  | 6      | N      | N      |
| Sputum   | 1   | 7      | P      | P      |
| Sputum   | 6   | 8      | P      | P      |
| Sputum   | 11  | 9      | N      | N      |
| Saliva   | 2   | 10     | P      | P      |
| Saliva   | 8   | 11     | P      | P      |
| Saliva   | 16  | 12     | N      | N      |

N gene

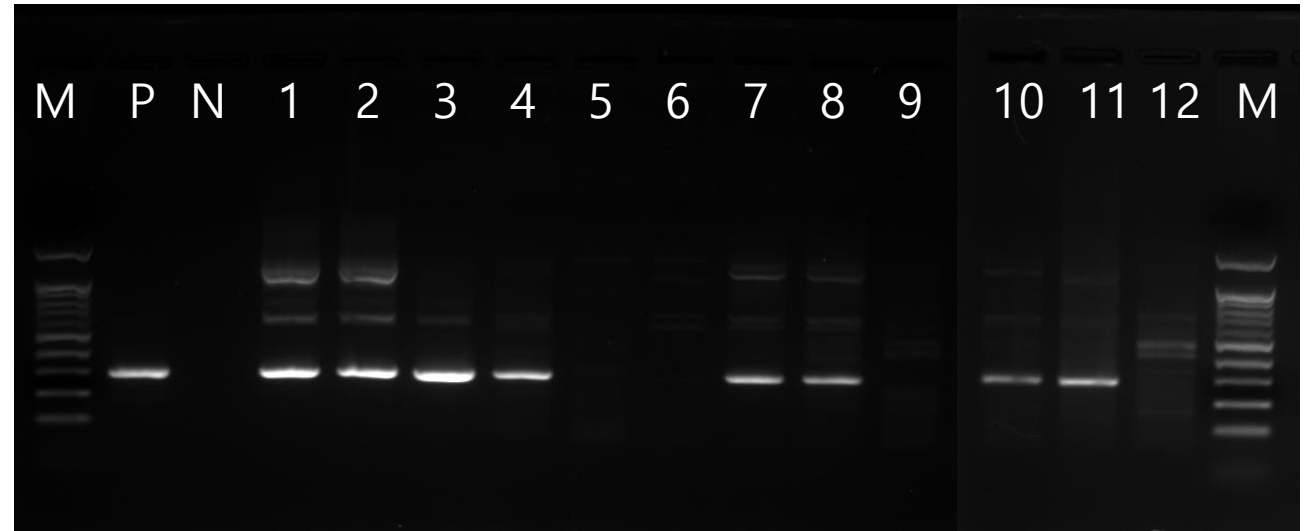

S gene

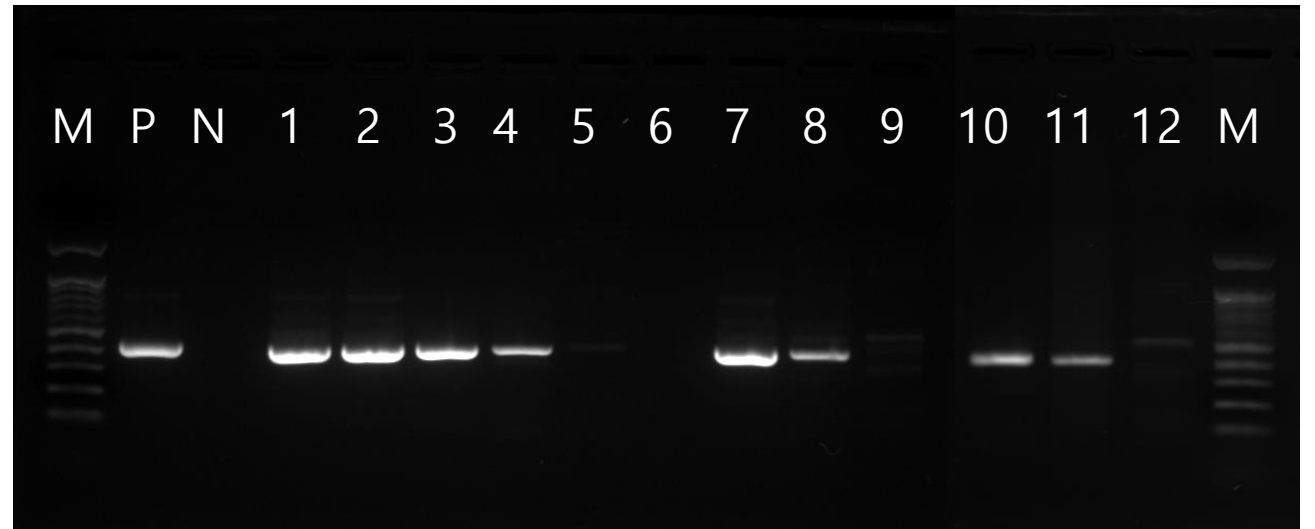

- SP-5: No significant similarity found

# Patient 13

| Specimen | SOD | Band # | SGR-NP | SGR-SP |
|----------|-----|--------|--------|--------|
| NP       | 3   | 1      | P      | P      |
| NP       | 5   | 2      | P      | P      |
| NP       | 8   | 3      | P      | P      |
| NP       | 10  | 4      | P      | P      |
| Sputum   | 3   | 5      | P      | P      |
| Sputum   | 5   | 6      | P      | P      |
| Sputum   | 8   | 7      | P      | P      |
| Sputum   | 10  | 8      | P      | P      |
| Saliva   | 3   | 9      | N      | P      |
| Saliva   | 5   | 10     | P      | P      |
| Saliva   | 8   | 11     | P      | P      |
| Saliva   | 10  | 12     | P      | P      |

N gene

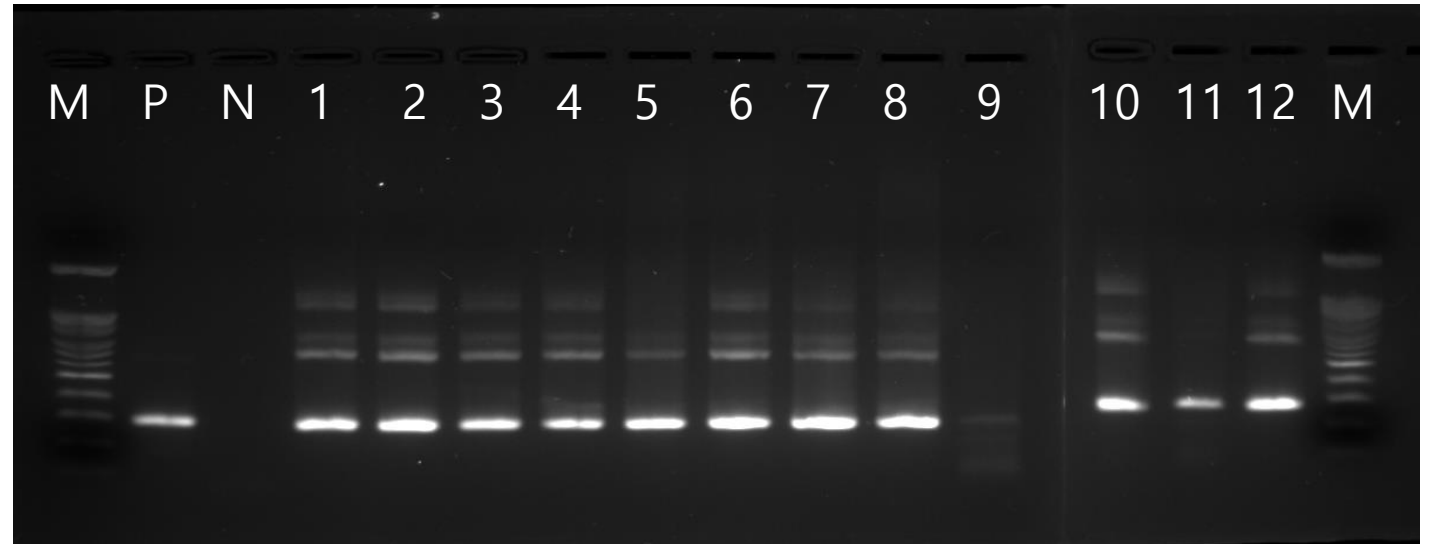

S gene

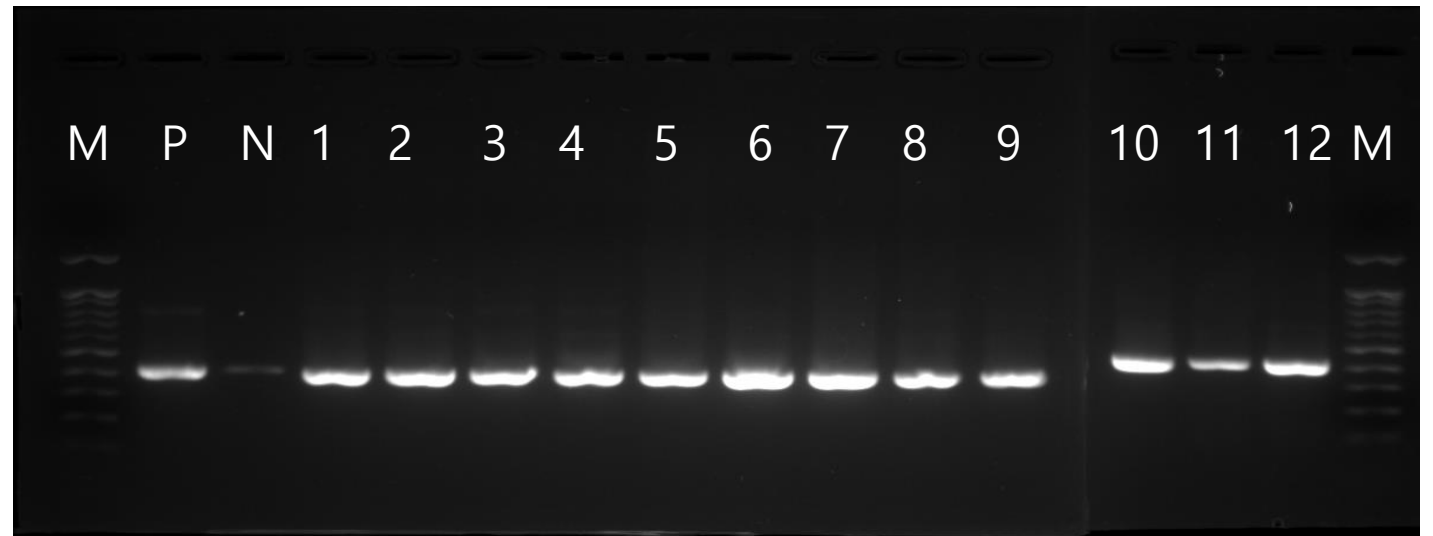

# Patient 14

| Specimen | SOD | Band # | SGR-NP | SGR-SP |
|----------|-----|--------|--------|--------|
| NP       | 5   | 1      | P      | P      |
| NP       | 17  | 2      | P      | P      |
| NP       | 23  | 3      | N      | N      |
| Sputum   | 5   | 4      | P      | P      |
| Sputum   | 13  | 5      | P      | P      |
| Sputum   | 17  | 6      | P      | P      |
| Sputum   | 30  | 7      | N      | N      |
| Saliva   | 5   | 8      | P      | P      |
| Saliva   | 13  | 9      | P      | P      |
| Saliva   | 23  | 10     | N      | N      |

\*SP-7: 90% Identity → negative  
not sequenced 5' leader

N gene

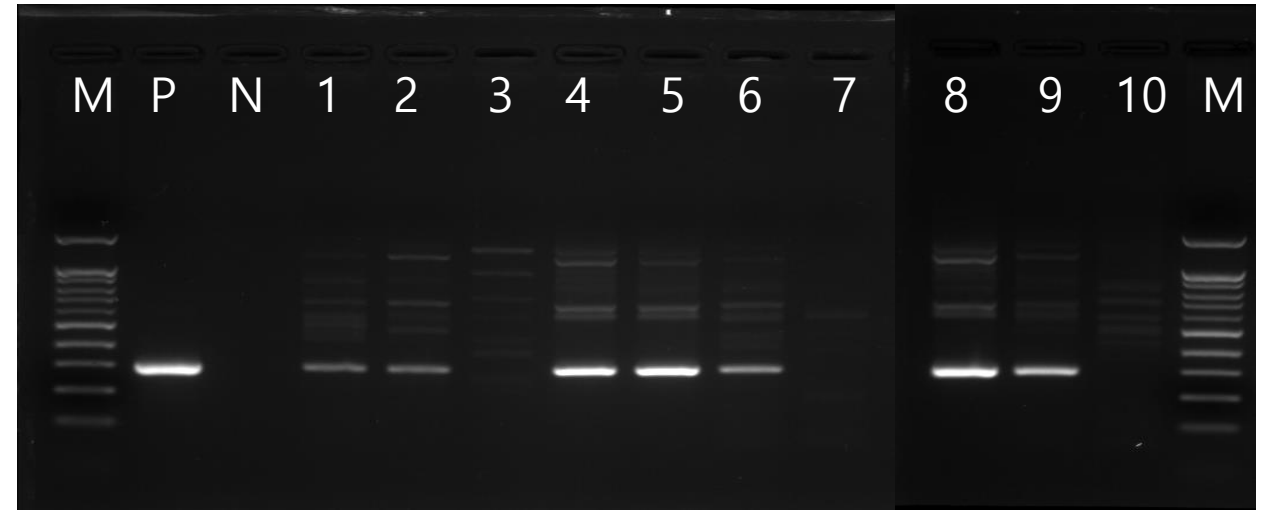

S gene

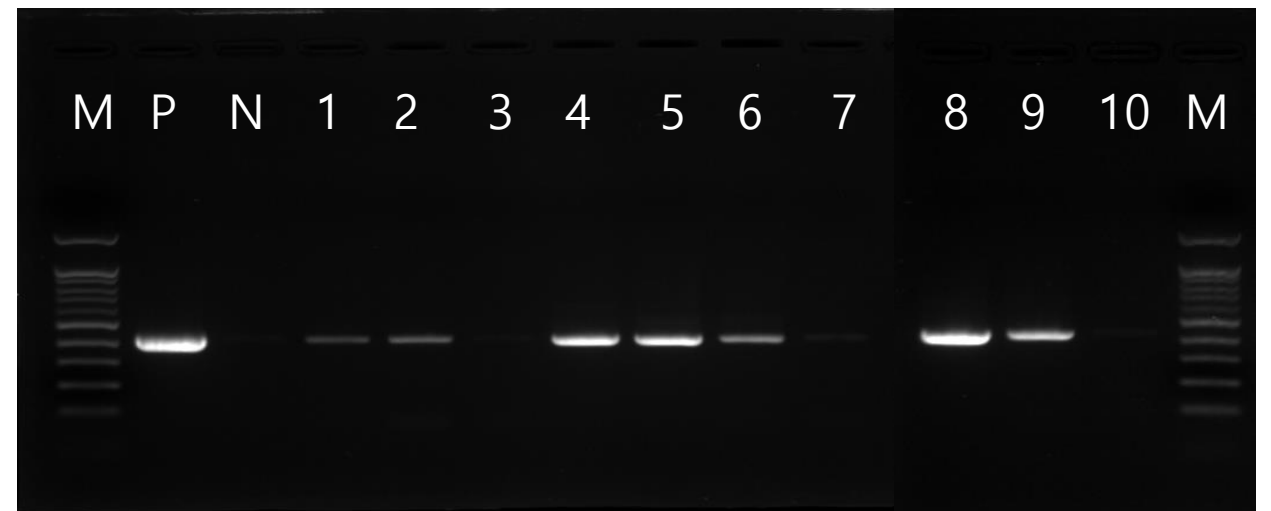



# Patient 15

| Specimen | SOD | Band # | SGR-NP | SGR-SP |
|----------|-----|--------|--------|--------|
| NP       | 6   | 1      | P      | P      |
| NP       | 9   | 2      | P      | P      |
| NP       | 13  | 3      | N      | N      |
| Sputum   | 9   | 4      | P      | P      |
| Sputum   | 19  | 5      | N      | N      |
| Sputum   | 33  | 6      | N      | N      |
| Saliva   | 6   | 7      | P      | P      |
| Saliva   | 26  | 8      | N      | N      |

N gene

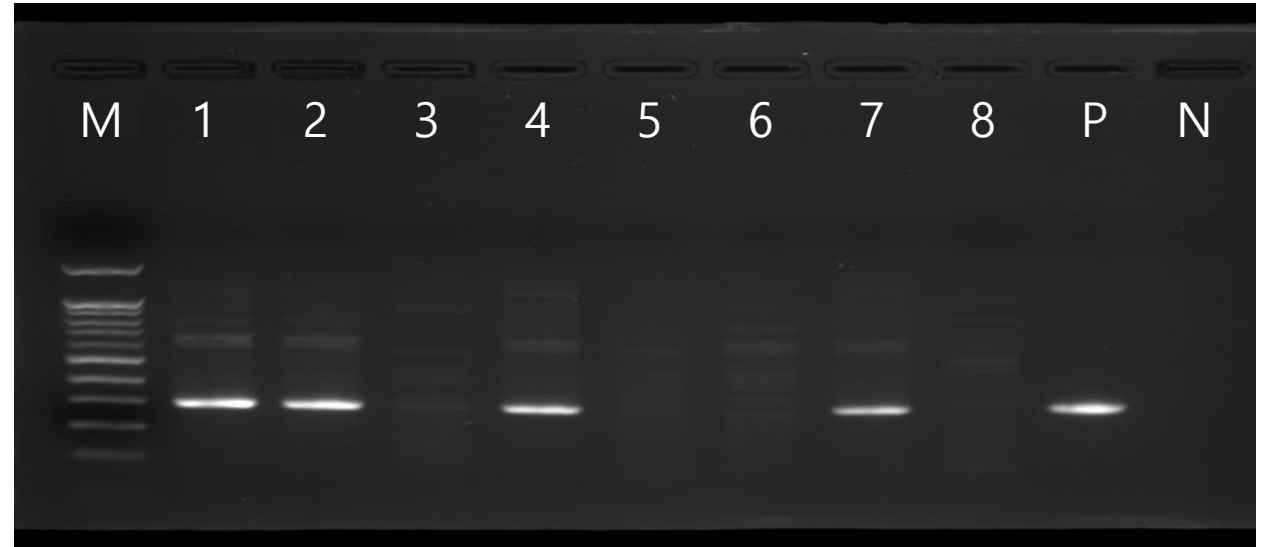

S gene

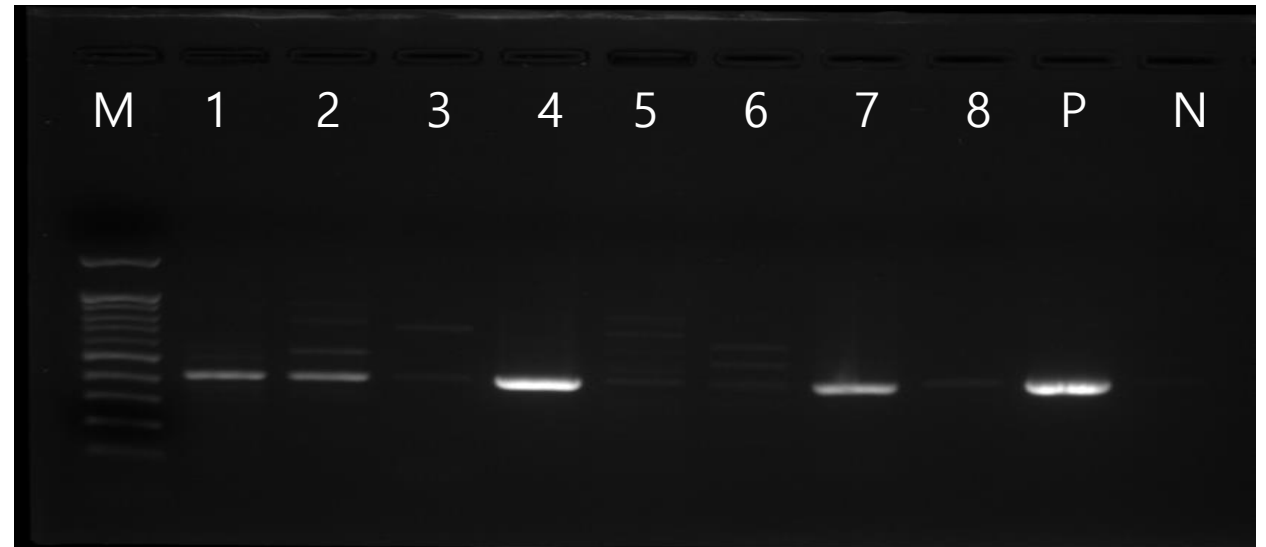

# Patient 16

| Specimen | SOD | Band # | SGR-NP | SGR-SP |
|----------|-----|--------|--------|--------|
| NP       | 5   | 1      | P      | P      |
| NP       | 7   | 2      | P      | P      |
| NP       | 13  | 3      | P      | P      |
| NP       | 20  | 4      | N      | N      |
| Sputum   | 5   | 5      | P      | P      |
| Sputum   | 7   | 6      | P      | P      |
| Sputum   | 20  | 7      | P      | P      |
| Saliva   | 5   | 8      | P      | P      |
| Saliva   | 7   | 9      | N      | N      |

N gene

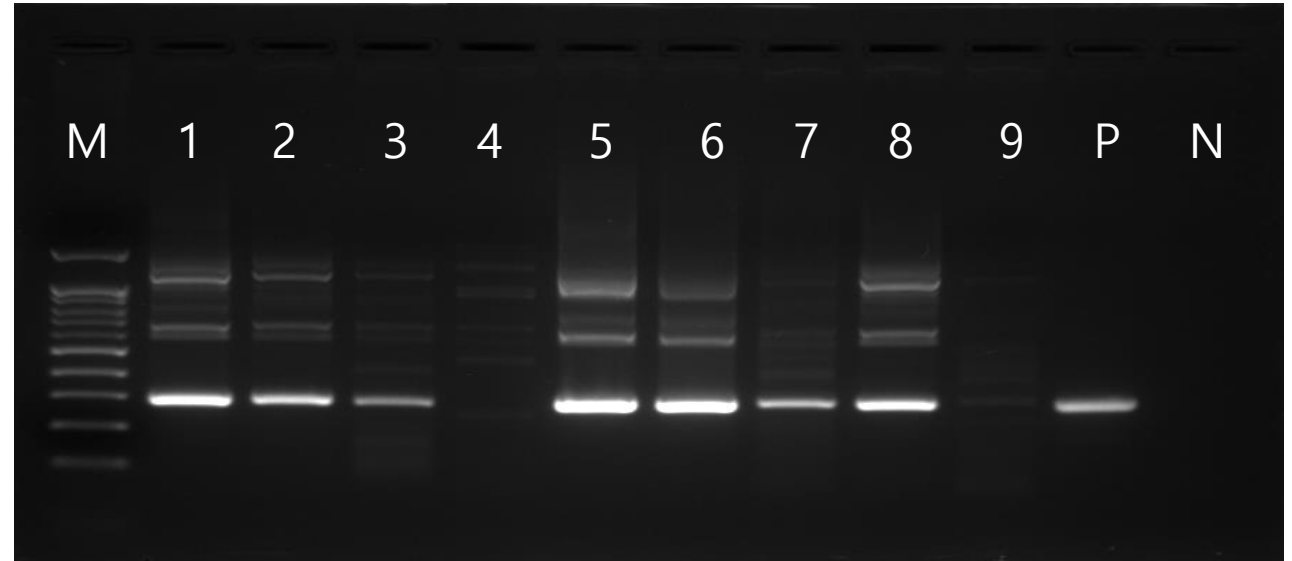

S gene

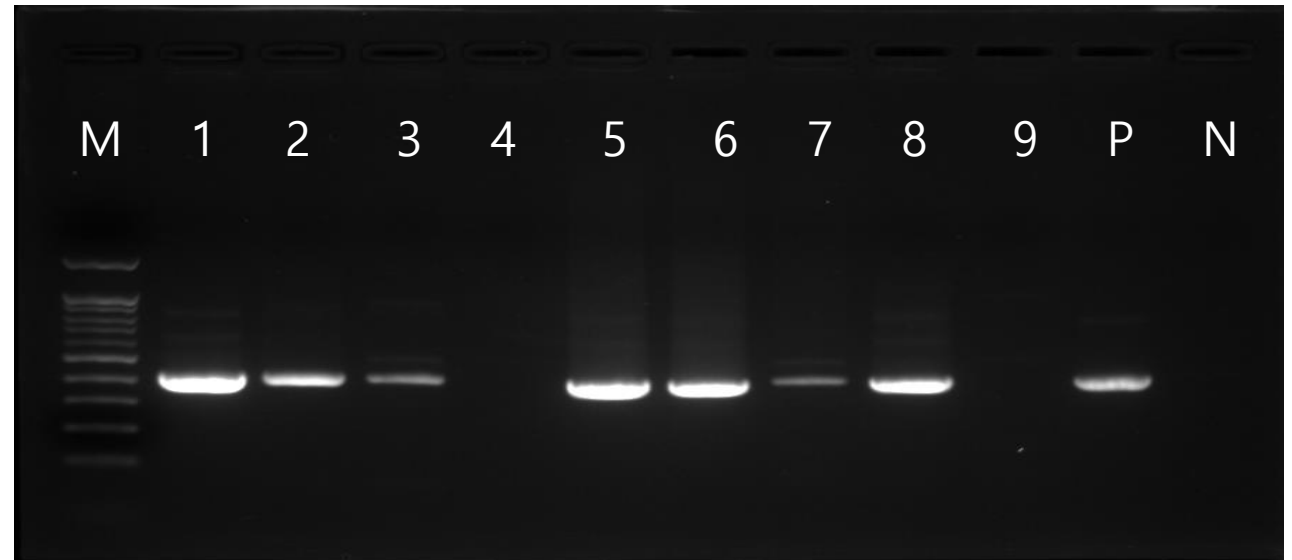

# Patient 17

| Specimen | SOD | Band # | SGR-NP | SGR-SP |
|----------|-----|--------|--------|--------|
| NP       | 2   | 1      | P      | P      |
| NP       | 4   | 2      | P      | P      |
| NP       | 7   | 3      | P      | P      |
| NP       | 14  | 4      | P      | N      |

- **SP-4: No significant similarity found**

N gene

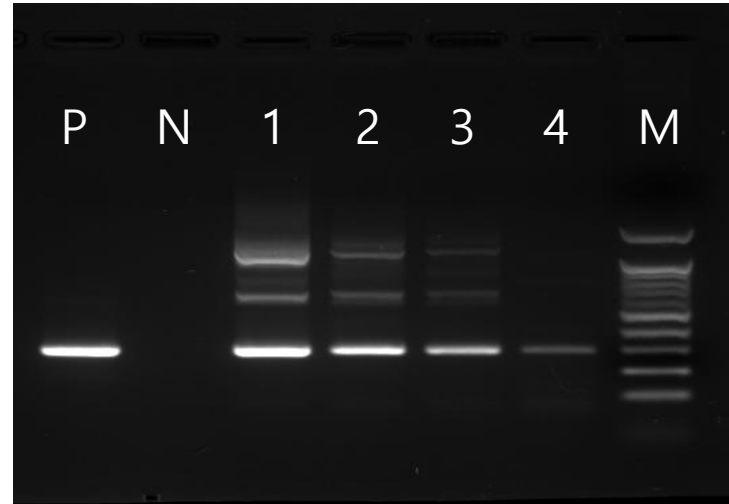

S gene

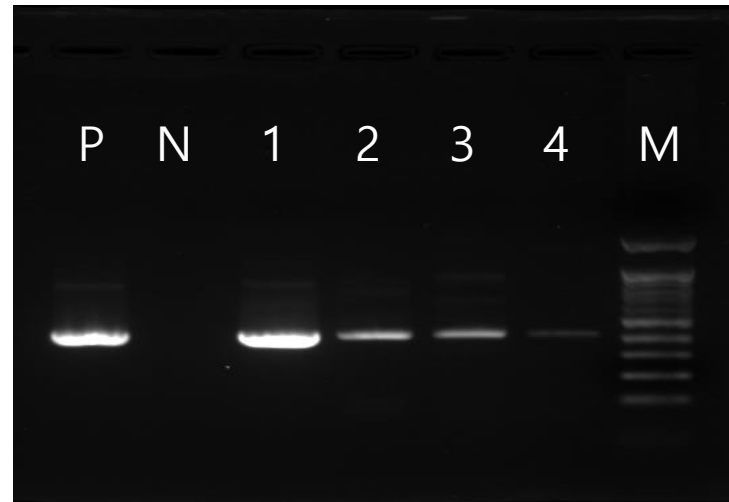

# Patient 18

| Specimen | SOD | Band # | SGR-NP | SGR-SP |
|----------|-----|--------|--------|--------|
| NP       | 4   | 1      | P      | P      |
| NP       | 7   | 2      | P      | P      |
| NP       | 11  | 3      | P      | P      |
| NP       | 13  | 4      | P      | P      |
| Sputum   | 7   | 5      | P      | P      |
| Sputum   | 11  | 6      | P      | P      |
| Sputum   | 13  | 7      | N      | N      |
| Saliva   | 4   | 8      | P      | P      |
| Saliva   | 11  | 9      | P      | P      |

N gene

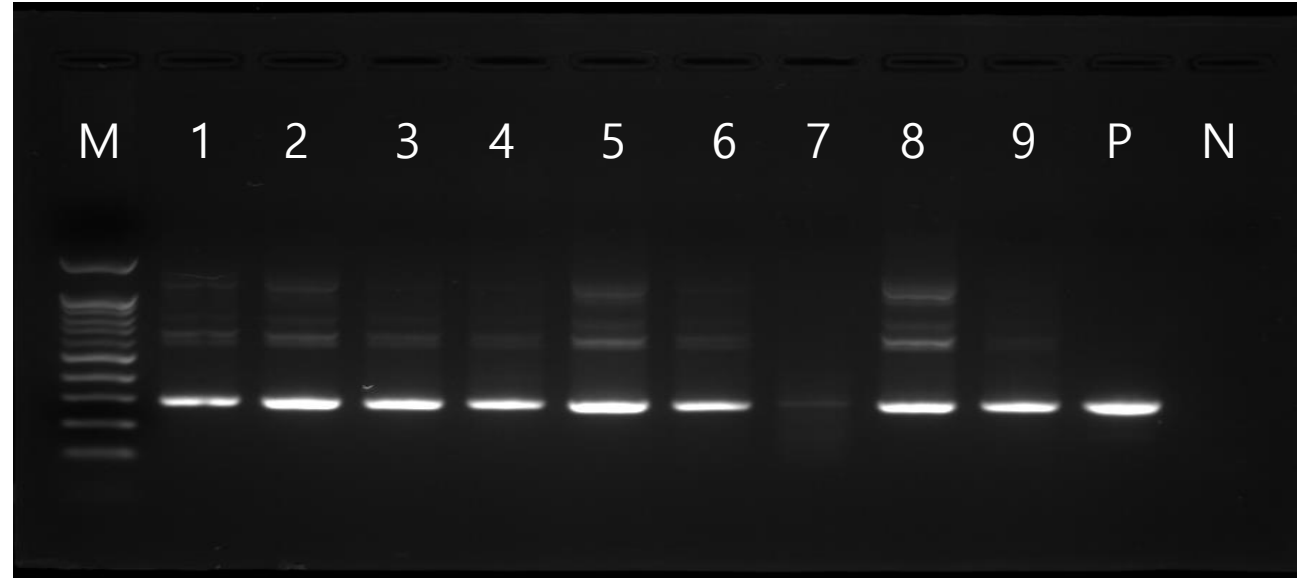

S gene

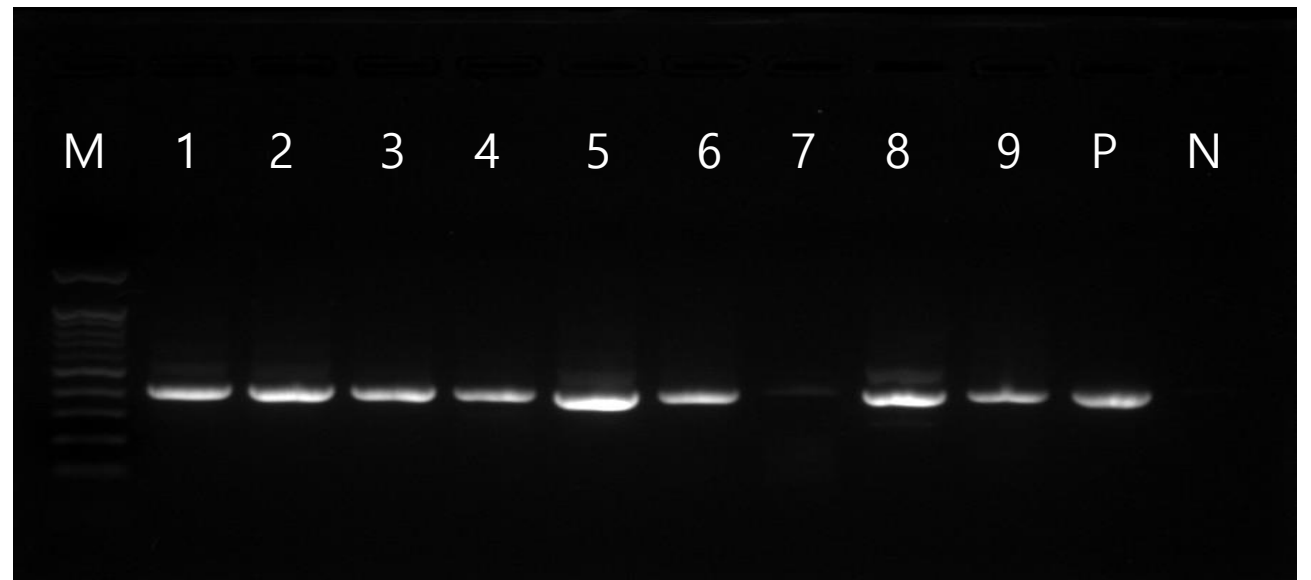

# Patient 19

| Specimen | SOD | Band # | SGR-NP | SGR-SP |
|----------|-----|--------|--------|--------|
| NP       | 3   | 1      | P      | P      |
| NP       | 10  | 2      | P      | P      |
| NP       | 17  | 3      | N      | N      |
| Sputum   | 7   | 4      | P      | P      |
| Saliva   | 7   | 5      | P      | P      |
| Saliva   | 17  | 6      | N      | N      |

- NP-3: 94% Identity → negative
- NP-5: 98% Identity → positive
- SP-3: not sequenced 5' leader → negative

N gene

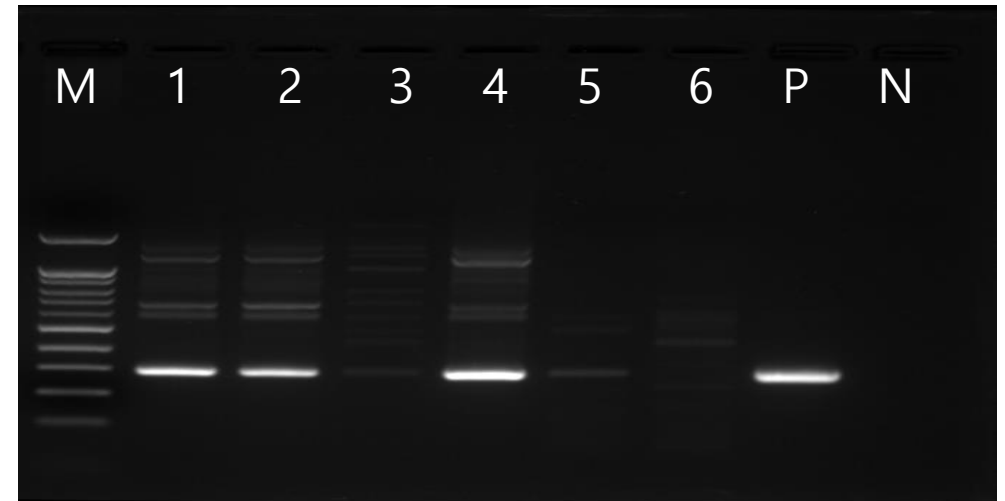

S gene

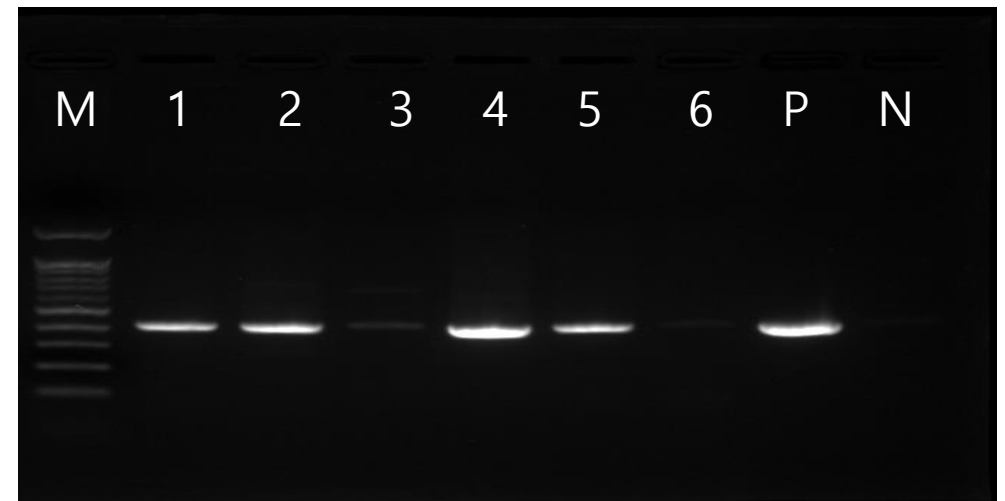

# Patient 20

| Specimen | SOD | Band # | SGR-NP | SGR-SP |
|----------|-----|--------|--------|--------|
| NP       | 5   | 1      | P      | P      |
| NP       | 7   | 2      | P      | N      |
| NP       | 11  | 3      | N      | N      |
| Sputum   | 5   | 4      | N      | N      |
| Sputum   | 7   | 5      | N      | N      |
| Sputum   | 11  | 6      | N      | N      |
| Saliva   | 5   | 7      | N      | N      |
| Saliva   | 7   | 8      | N      | N      |

- NP-4, 5: mixed sequences → Negative
- NP-7: 91% Identity → Negative
- NP-8: 97% Identity → Negative
- SP-4, 5: not sequenced 5' leader → negative
- SP-7: not sequenced 5' leader → negative
- SP-8: No significant similarity found

N gene

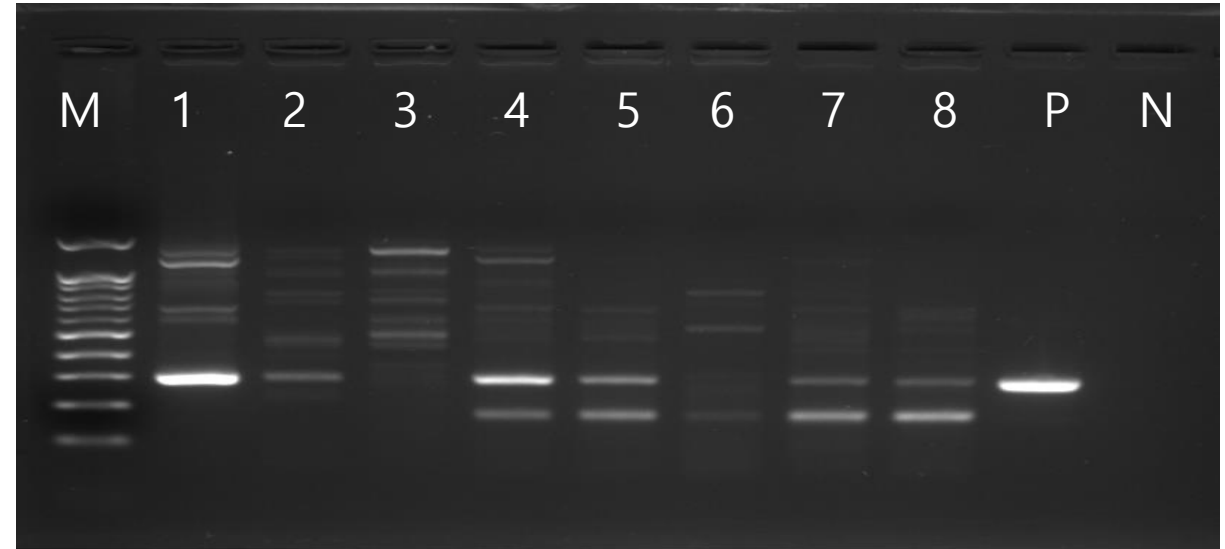

S gene

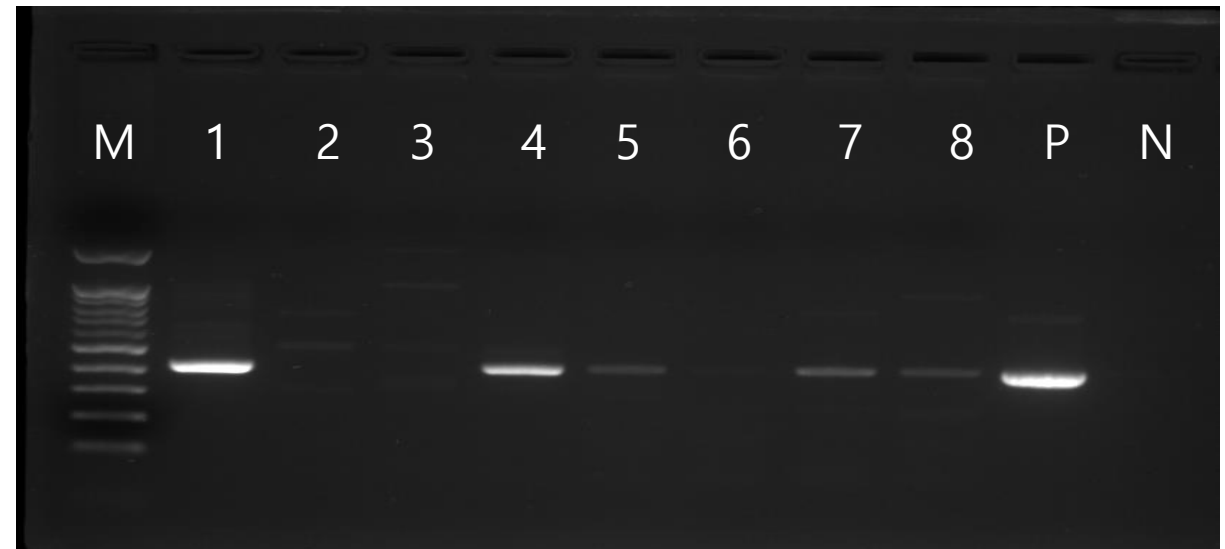

# Additional specimens

# 1: patient #13: 2020-09-08, Saliva  
# 2: patient # 18: 2020-11-20, Sputum

N gene

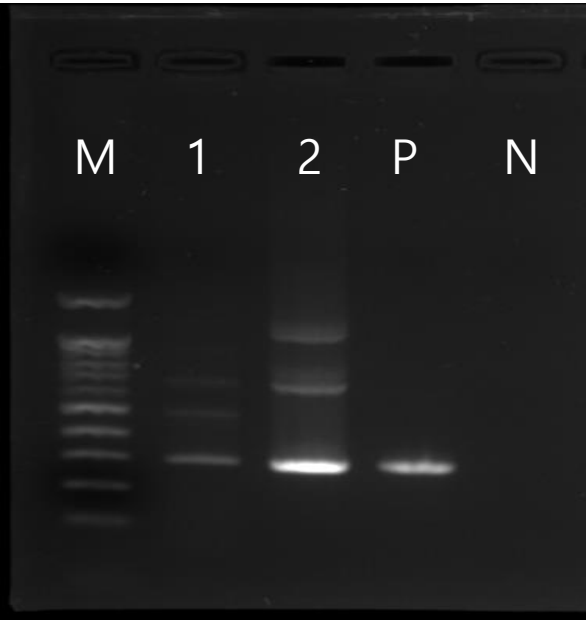

S gene

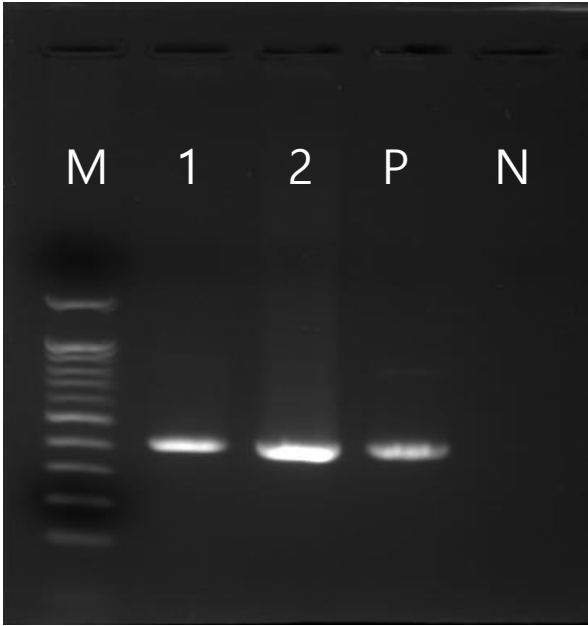

Supplement: mmc2.pdf [file mmc2.pdf]
